# Supplementary material for: miR-135a promotes gastric cancer progression and resistance to oxaliplatin
Source: PubMed Central journal article supplement (PMC5342584; doi:10.18632/oncotarget.12208), 2016-09-23
Supplement: oncotarget-07-70699-s001.pdf [file oncotarget-07-70699-s001.pdf]

## *miR-135a* promotes gastric cancer progression and resistance to oxaliplatin

### SUPPLEMENTARY FIGURES AND TABLES

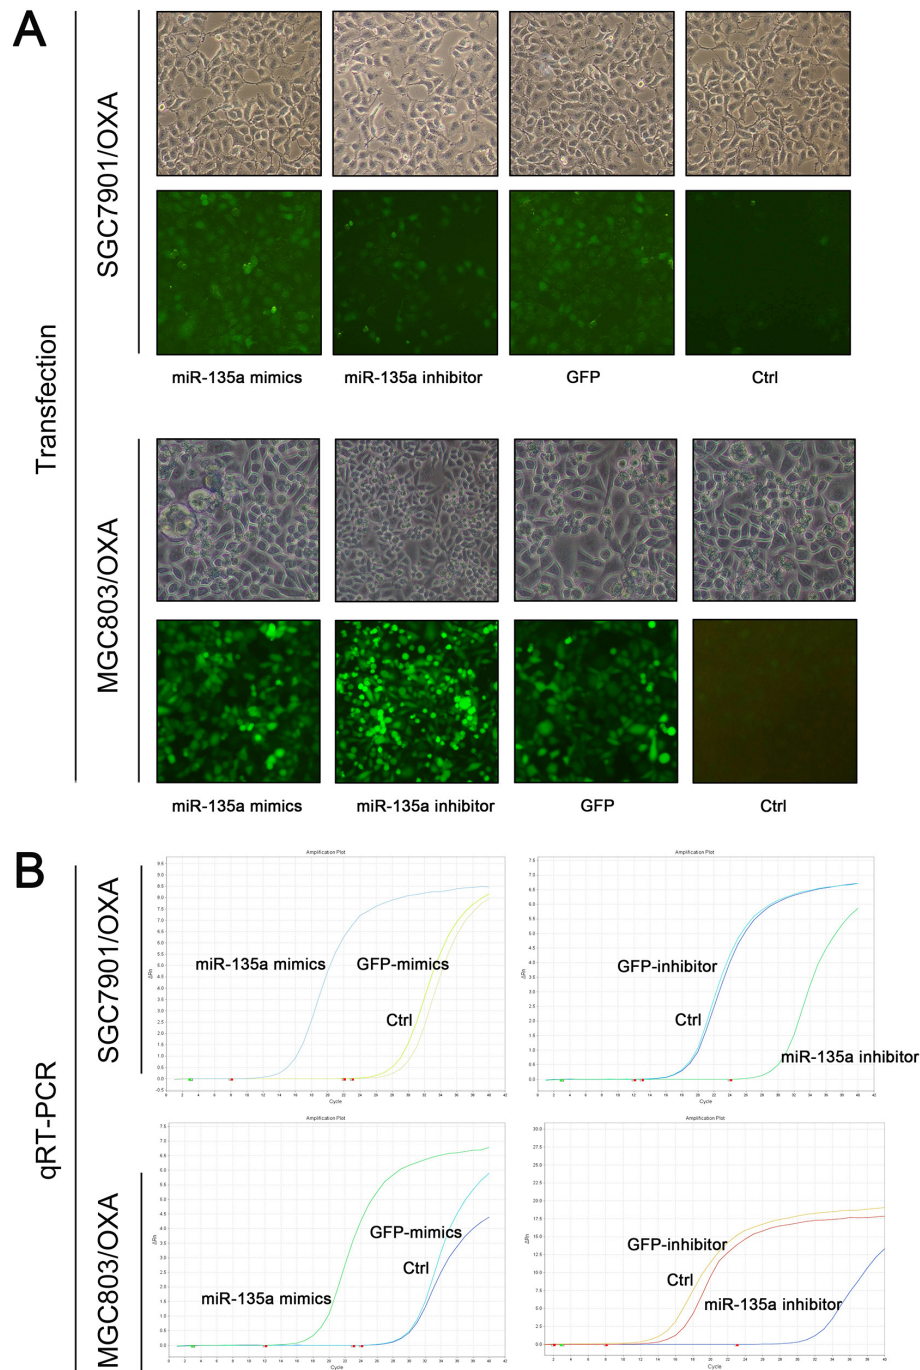

**Supplementary Figure S1: Effect of the *miR-135a* inhibitor (or mimic) on *miR-135a* expression *in vitro*.** **A.** Transfection efficiency after screening by G418 and evaluation by fluorescence microscopy. Under light microscope ( $\times 100$ ) and fluorescence microscope ( $\times 100$ ). **B.** qRT-PCR of *miR-135a* expression. The expression of *miR-135a* was stably downregulated by a *miR-135a* inhibitor and upregulated by a *miR-135a* mimic in SGC7901/OXA and MGC803/OXA cells.

SGC7901/OXA

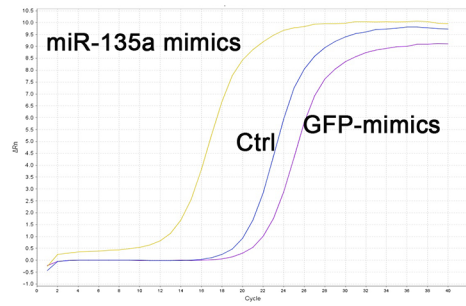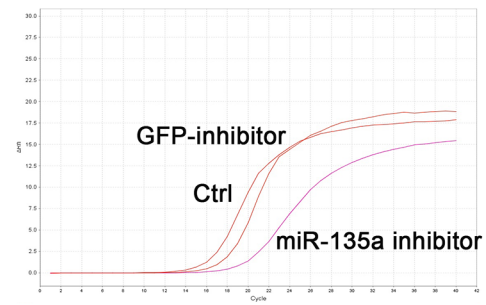

MGC803/OXA

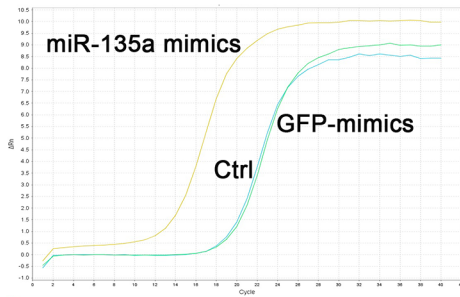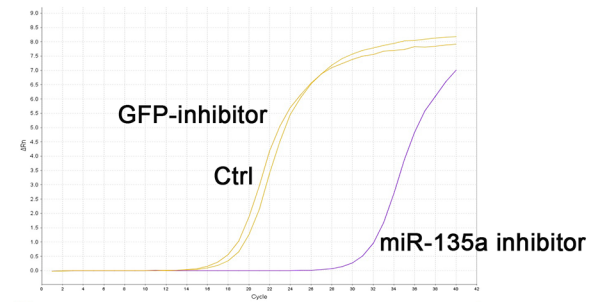

**Supplementary Figure S2: Effect of the *miR-135a* inhibitor (or mimic) on *miR-135a* expression *in vivo*.** The miRNA level of *miR-135a* was determined by a semi-quantitative reverse-transcriptase polymerase chain reaction. *miR-135a* expression was stably downregulated (with an inhibitor) or upregulated (with a mimic) in SGC7901/OXA and MGC803/OXA cells, and the cells were inoculated subcutaneously into the flanks of nude mice.

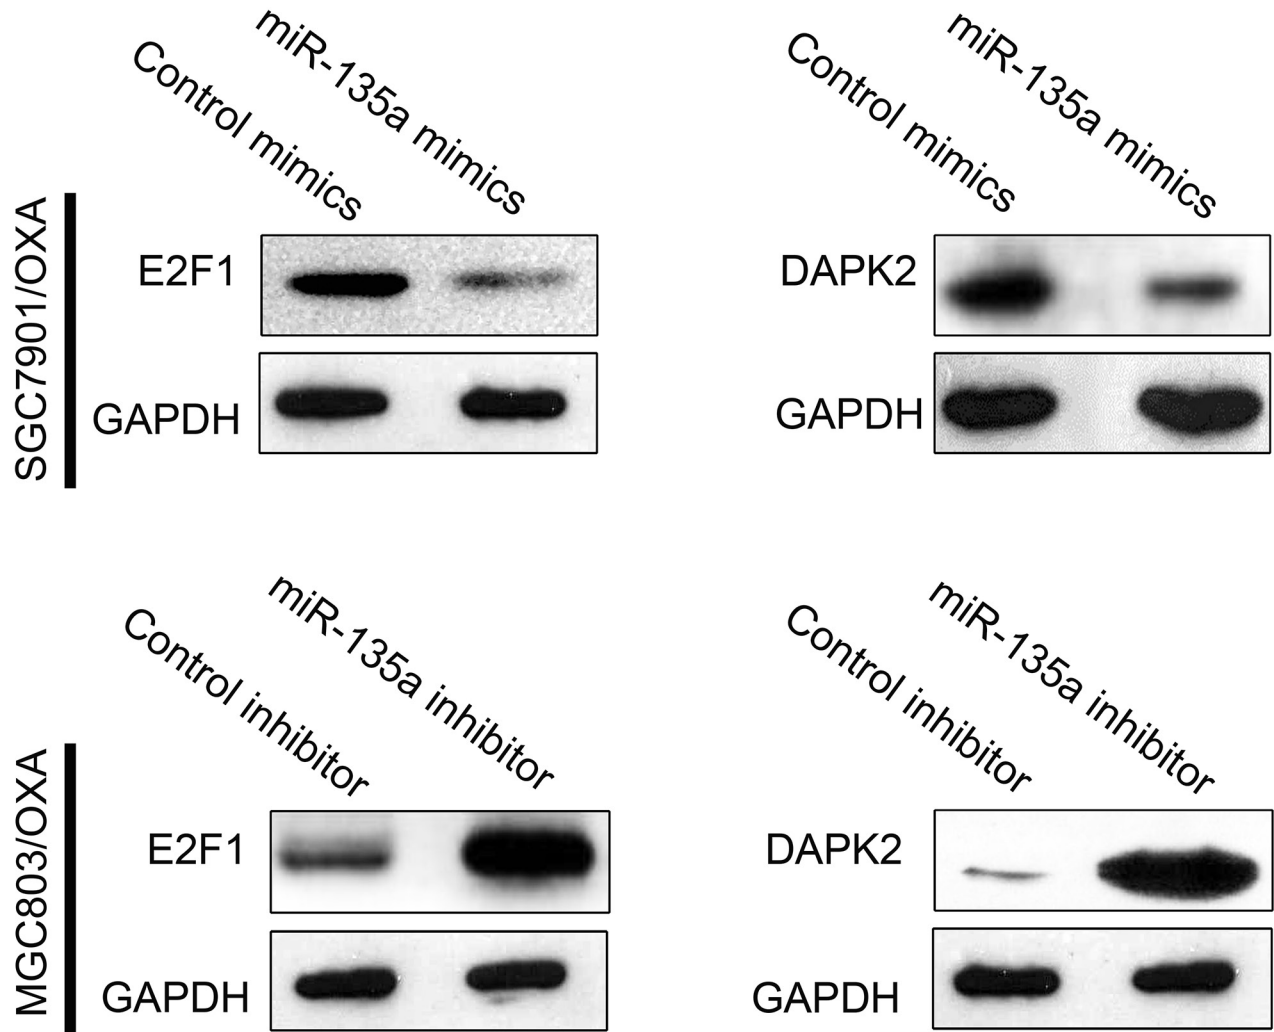

**Supplementary Figure S3: Effect of the *miR-135a* inhibitor (or mimic) on E2F1 and DAPK2 expression *in vivo*.** Protein levels of E2F1 and DAPK2 were determined by Western blotting. *miR-135a* significantly reduced the protein levels of E2F1 and DAPK2 in the tumor tissues of nude mice.

Supplementary Table S1: Distribution of patients' characteristics and prognosis analysis

| Characteristics        | Total, N = 280 | Recurrence, N =198 | Crude HR (95% CIs) | Adjusted HR, (95% CI) |
|------------------------|----------------|--------------------|--------------------|-----------------------|
| Age                    |                |                    |                    |                       |
| < 50 years             | 132            | 92                 | -                  | -                     |
| ≥ 50 years             | 148            | 106                | 1.56 (0.79–2.51)   | 1.76 (1.12–3.08)      |
| Sex                    |                |                    |                    |                       |
| Female                 | 123            | 87                 | -                  | -                     |
| Male                   | 157            | 111                | 0.67 (0.51–1.13)   | 0.58 (0.37–1.02)      |
| Gastrohelcosis         |                |                    |                    |                       |
| No                     | 108            | 67                 | -                  | -                     |
| Yes                    | 172            | 131                | 1.25 (0.56–1.88)   | 1.66 (0.67–1.95)      |
| Smoking                |                |                    |                    |                       |
| No                     | 131            | 92                 | -                  | -                     |
| Yes                    | 149            | 106                | 0.77(0.40–1.15)    | 0.70 (0.40–1.22)      |
| Drinking               |                |                    |                    |                       |
| No                     | 158            | 124                | -                  | -                     |
| Yes                    | 122            | 74                 | 0.69 (0.40–1.32)   | 0.82 (0.44–1.53)      |
| CEA                    |                |                    |                    |                       |
| ≤ 20 µg/L              | 91             | 66                 | -                  | -                     |
| > 20 µg/L              | 189            | 132                | 1.26 (0.75–2.12)   | 2.10 (1.20–3.67)      |
| CA19-9                 |                |                    |                    |                       |
| ≤ 40 U/L               | 95             | 76                 | -                  | -                     |
| > 40 U/L               | 185            | 122                | 1.54 (0.94–2.56)   | 1.86 (1.13–3.29)      |
| HP infection           |                |                    |                    |                       |
| Negative               | 97             | 63                 | -                  | -                     |
| Positive               | 183            | 135                | 1.35 (0.72–2.51)   | 1.94 (0.89–2.80)      |
| Tumor size             |                |                    |                    |                       |
| < 3 cm                 | 79             | 48                 | -                  | -                     |
| ≥ 3 cm                 | 201            | 150                | 2.65 (1.50–4.67)   | 3.68 (2.02–6.71)      |
| Tumor number           |                |                    |                    |                       |
| Single                 | 188            | 121                | -                  | -                     |
| Multiple               | 92             | 77                 | 1.66 (0.85–3.23)   | 1.34 (0.75–3.12)      |
| TNM staging            |                |                    |                    |                       |
| I+II                   | 79             | 28                 | -                  | -                     |
| III+IV                 | 201            | 170                | 1.87 (0.64–2.84)   | 1.82 (0.46–2.44)      |
| Microvascular invasion |                |                    |                    |                       |
| No                     | 109            | 58                 | -                  | -                     |
| Yes                    | 171            | 140                | 1.66 (0.85–3.23)   | 1.30 (0.65–2.60)      |
| Lymphatic metastasis   |                |                    |                    |                       |
| No                     | 99             | 68                 | -                  | -                     |
| Yes                    | 181            | 130                | 1.13 (0.65–2.36)   | 0.91 (0.42–1.95)      |

Supplementary Table S2: Correlation of Clinicopathologic Characteristics with miR-135a Expression level

| Characteristics        | Total, N = 280 | miR-135a level |      | P value |
|------------------------|----------------|----------------|------|---------|
|                        |                | Low            | High |         |
| Age                    |                |                |      | 0.027   |
| < 50 years             | 132            | 86             | 46   |         |
| ≥ 50 years             | 148            | 56             | 92   |         |
| Sex                    |                |                |      | 0.443   |
| Female                 | 123            | 68             | 55   |         |
| Male                   | 157            | 79             | 78   |         |
| Gastrohelcosis         |                |                |      | 0.104   |
| No                     | 108            | 57             | 51   |         |
| Yes                    | 172            | 99             | 73   |         |
| Smoking                |                |                |      | 0.221   |
| No                     | 131            | 79             | 52   |         |
| Yes                    | 149            | 87             | 62   |         |
| Drinking               |                |                |      | 0.183   |
| No                     | 158            | 88             | 70   |         |
| Yes                    | 122            | 45             | 77   |         |
| CEA                    |                |                |      | <.001   |
| ≤ 20 µg/L              | 91             | 25             | 66   |         |
| > 20 µg/L              | 189            | 85             | 104  |         |
| CA19-9                 |                |                |      | 0.035   |
| ≤ 40 U/L               | 95             | 56             | 39   |         |
| > 40 U/L               | 185            | 98             | 87   |         |
| HP infection           |                |                |      | <.001   |
| Negative               | 97             | 49             | 48   |         |
| Positive               | 183            | 56             | 127  |         |
| Tumor size             |                |                |      | 0.368   |
| < 3 cm                 | 79             | 53             | 26   |         |
| ≥ 3 cm                 | 201            | 83             | 118  |         |
| Tumor number           |                |                |      | 0.013   |
| Single                 | 188            | 64             | 124  |         |
| Multiple               | 92             | 56             | 36   |         |
| TNM staging            |                |                |      | <.001   |
| I+II                   | 79             | 29             | 50   |         |
| III+IV                 | 201            | 62             | 139  |         |
| Microvascular invasion |                |                |      | <.001   |
| No                     | 109            | 33             | 76   |         |
| Yes                    | 171            | 68             | 103  |         |
| Lymphatic metastasis   |                |                |      | <.001   |
| No                     | 99             | 43             | 56   |         |
| Yes                    | 181            | 53             | 128  |         |

Supplementary Table S3: The base sequence of primers for RT-PCR

| Gene      | Primer  | Base sequence                 |
|-----------|---------|-------------------------------|
| miR-135a  | Forward | 5'-AACCTGCTCGCAGTATTTGA G-3'  |
|           | Reverse | 5'-GCGGCAGTATGGCTTTTTATTCC-3' |
| miR-135b  | Forward | 5'-TATGGCTTTTCATTCCATGTGA-3'  |
|           | Reverse | 5'-ATGGCTTTTTATTCCATGTGA-3'   |
| E2F1      | Forward | 5'-CCCAACTCCCTCTACCCT-3'      |
|           | Reverse | 5'-AAGCGAATCAATGGACTC-3'      |
| DAPK2     | Forward | 5'-TCTGGGAGGA GAGGACTGCA-3'   |
|           | Reverse | 5'-TACTCACGGCGGGAGGCTGA-3'    |
| P-gp      | Forward | 5'-ACCAAGCGGCTCCGATAC A-3'    |
|           | Reverse | 5'-TCATTGGCGAGCCTGGTAGTC-3'   |
| c-MYC     | Forward | 5'-TTCTCTCCGTCCTCGGATTC-3'    |
|           | Reverse | 5'-GTAGTTGTGCTGATGTGTGG-3'    |
| GAPDH (1) | Forward | 5'-ACAGCAACAGGGTGGTGGAC-3'    |
|           | Reverse | 5'-TTGAGGGTGCAGCGAACTT-3'     |
| GAPDH (2) | Forward | 5'-ACCACAGTCCATGCCATCAC-3'    |
|           | Reverse | 5'-TCACCACCCTGTTGCTGTA-3'     |
